# Supplementary material for: Circadian disruption and divergent microbiota acquisition under extended photoperiod regimens in chicken
Source: PeerJ journal article supplement (doi:10.7717/peerj.6592), 2019-03-14

**A**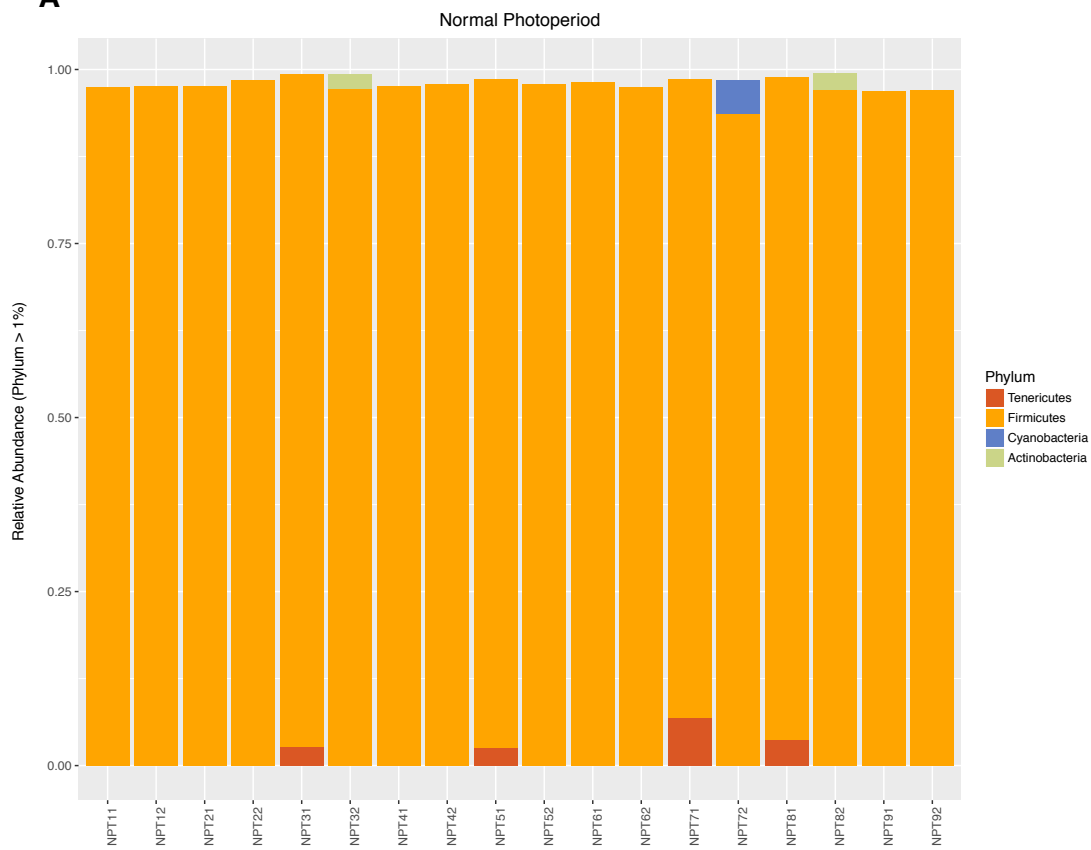**B**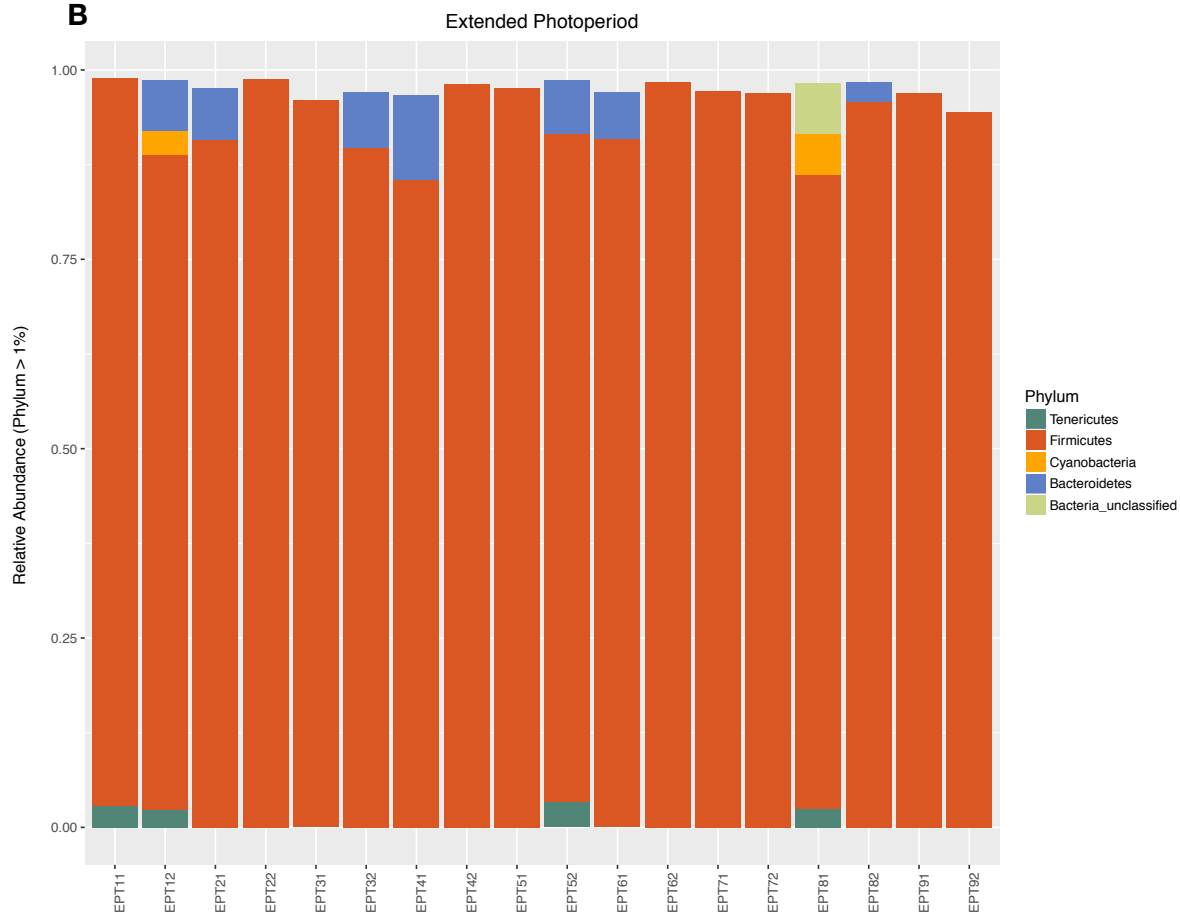

Supplement: FigureS3.pdf [file FigureS3.pdf]
