# Supplementary material for: Circadian disruption and divergent microbiota acquisition under extended photoperiod regimens in chicken
Source: PeerJ journal article supplement (doi:10.7717/peerj.6592), 2019-03-14

Phylum Composition

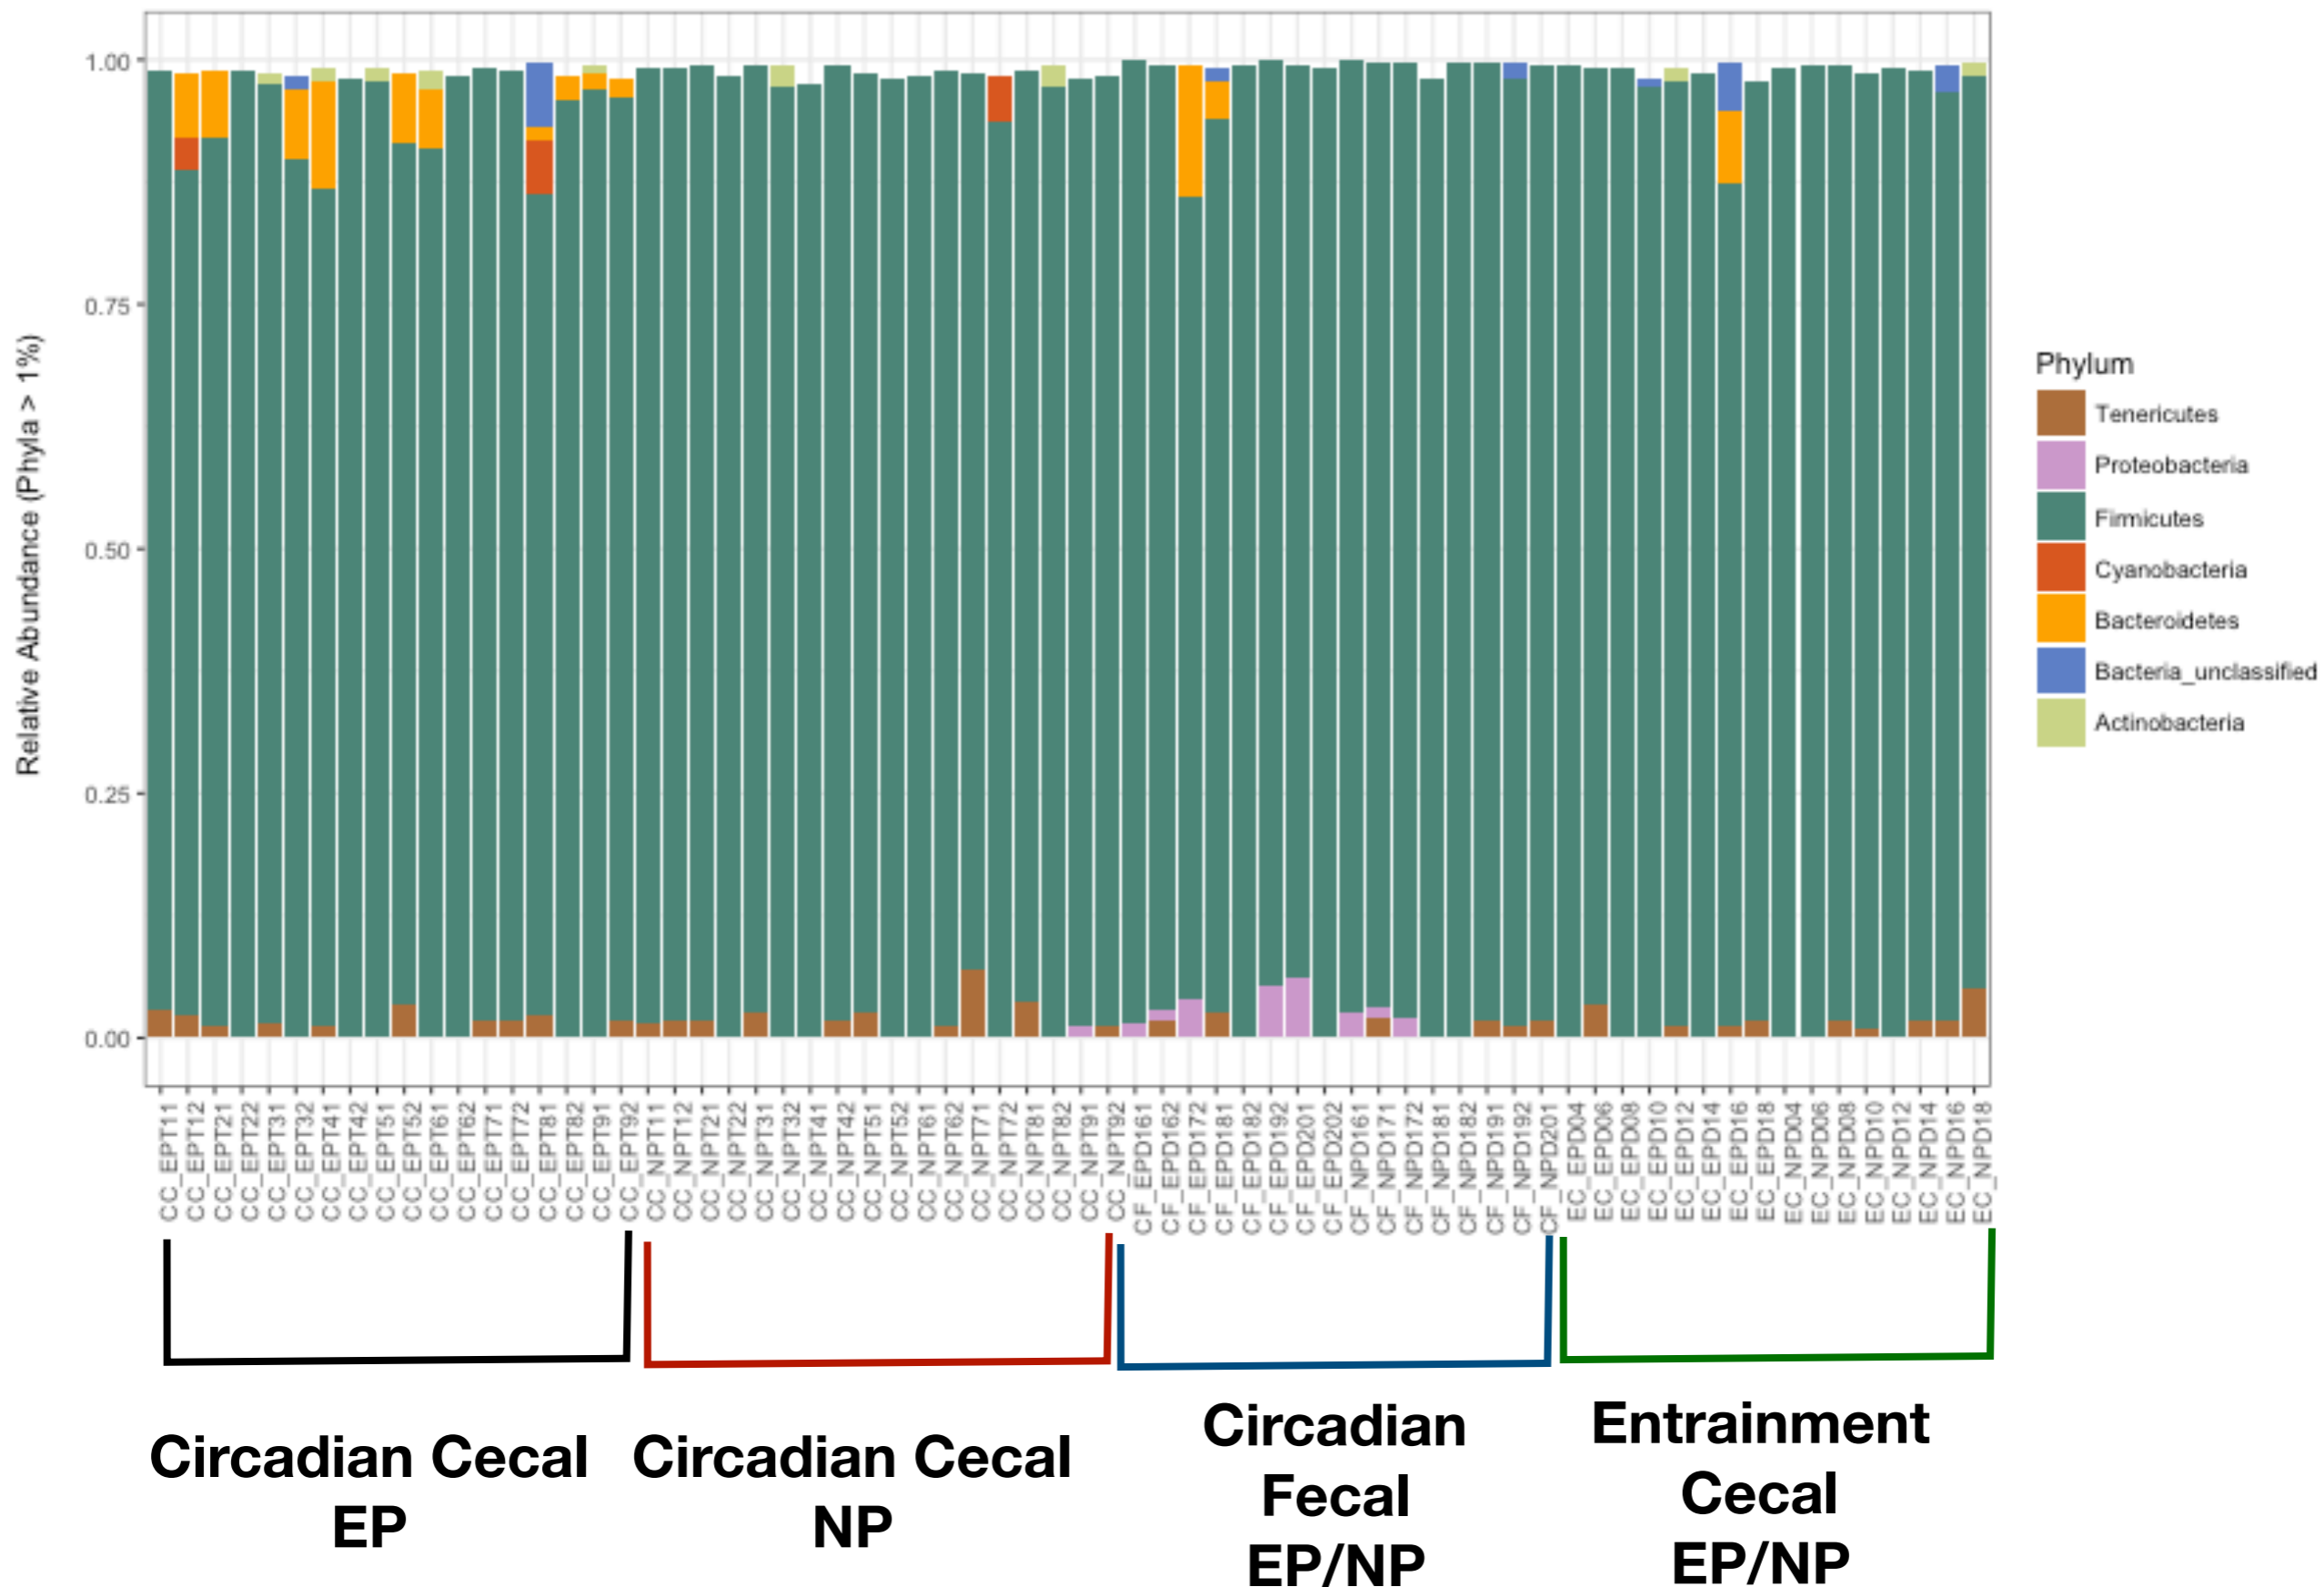

Supplement: FigureS4.pdf [file FigureS4.pdf]
