# Supplementary material for: Circadian disruption and divergent microbiota acquisition under extended photoperiod regimens in chicken
Source: PubMed Central journal article supplement (PMC6421066; doi:10.7717/peerj.6592), 2019-03-14

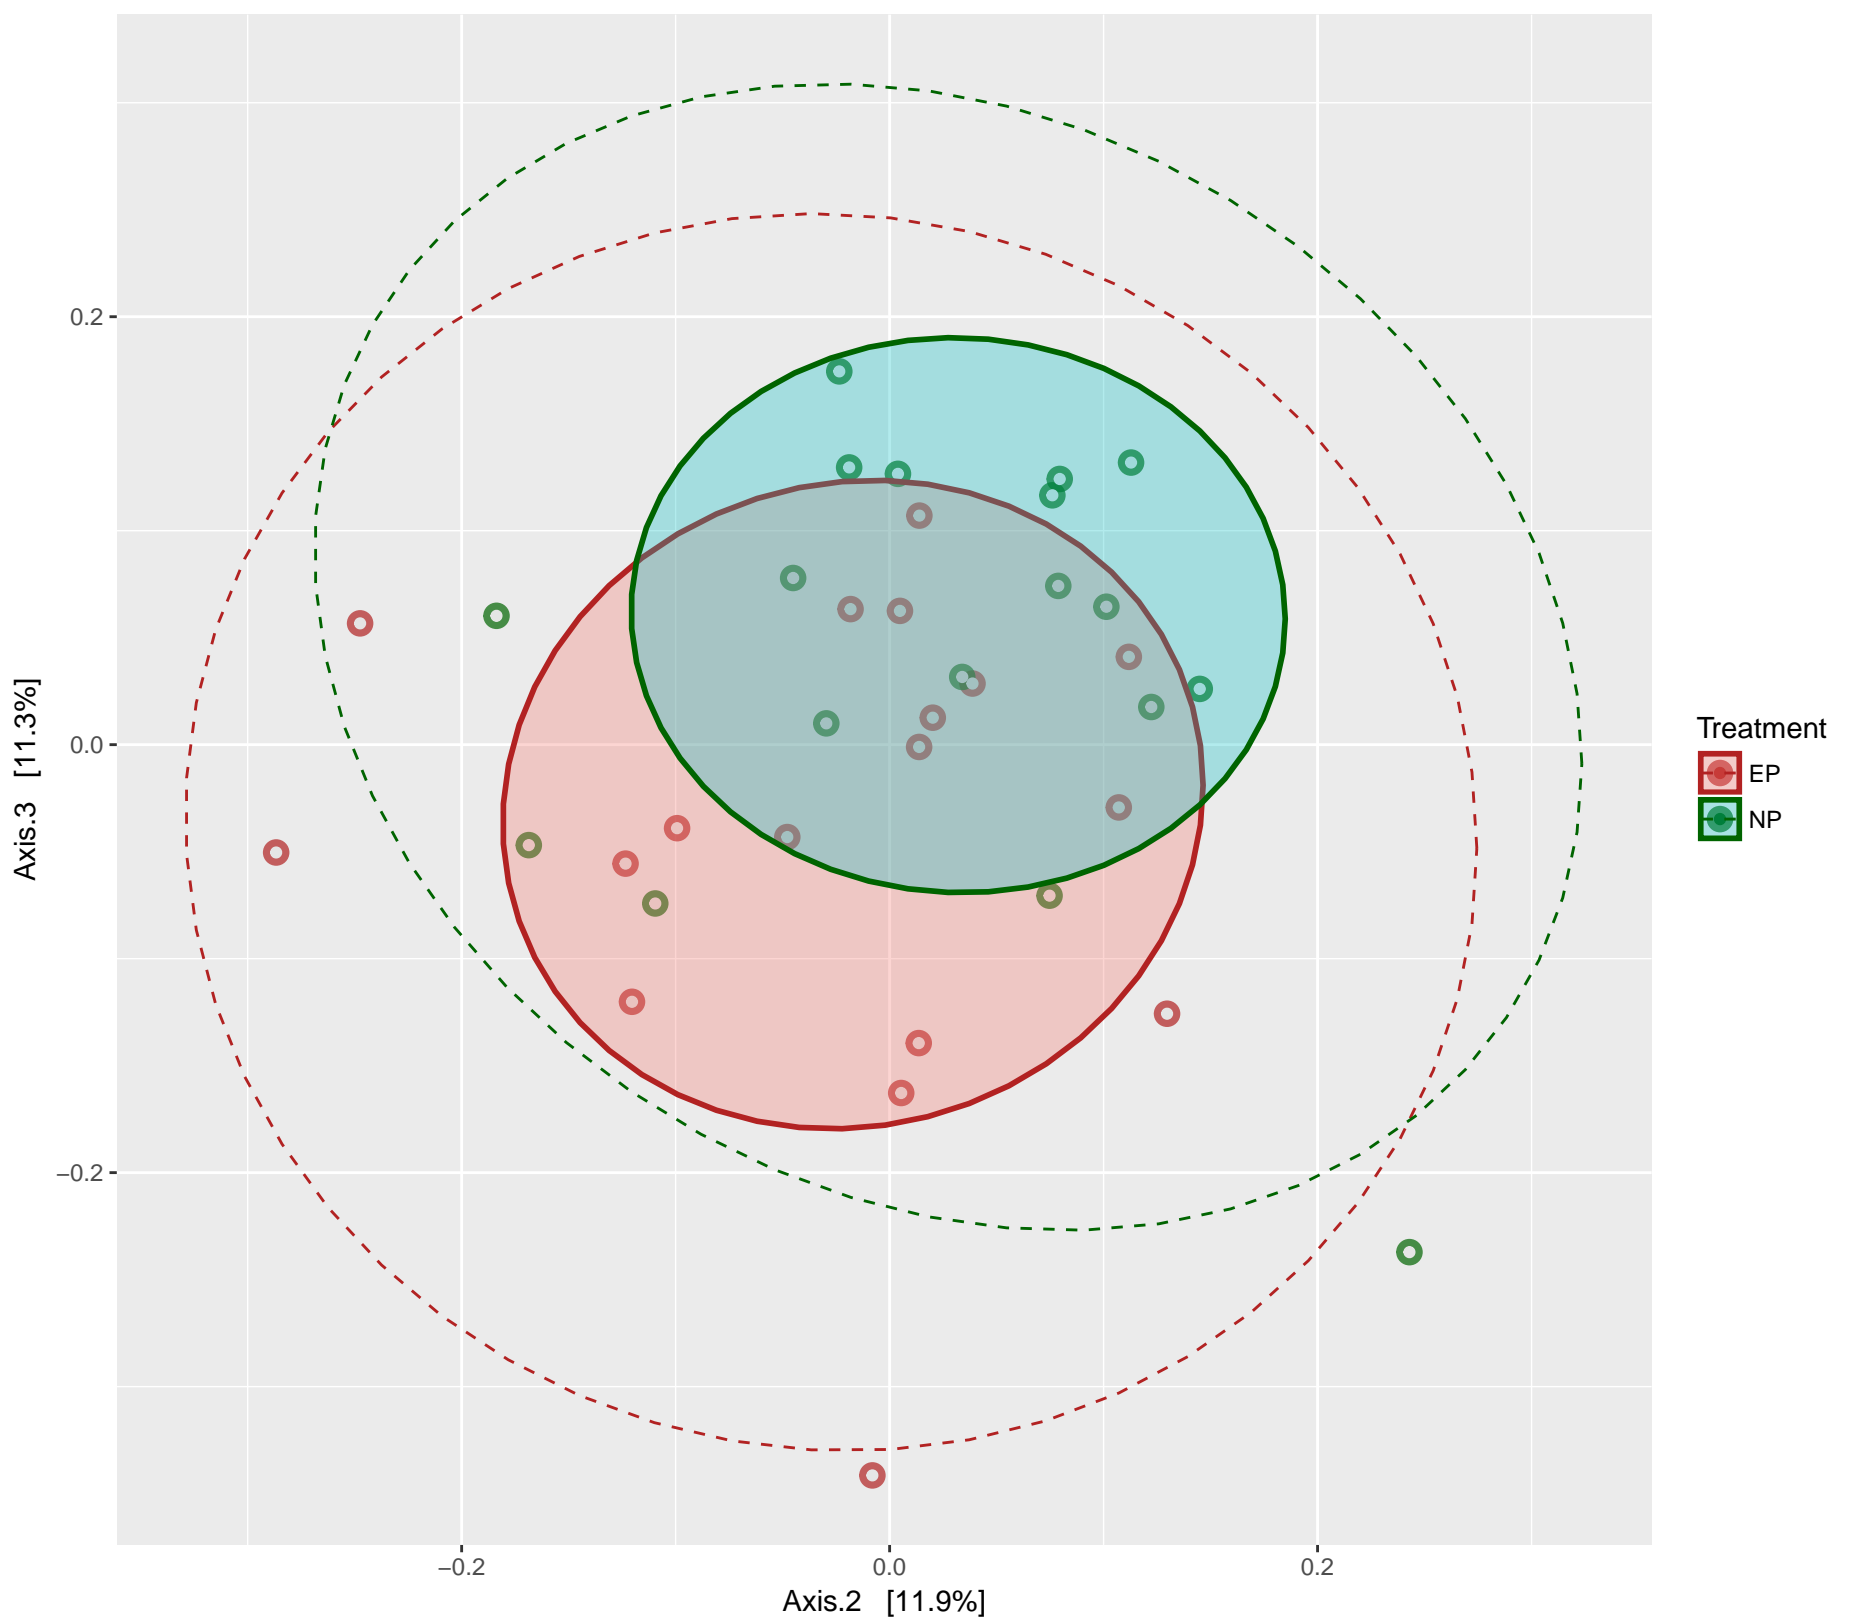

Supplement: peerj-07-6592-s002.pdf [file peerj-07-6592-s002.pdf]
