# Supplementary material for: Circadian disruption and divergent microbiota acquisition under extended photoperiod regimens in chicken
Source: PeerJ. 2019 Mar 14;7:e6592. doi: 10.7717/peerj.6592 (PMC6421066; doi:10.7717/peerj.6592)
Supplement: Supplemental Information 5 [file peerj-07-6592-s005.xlsx]

## Sheet: Sheet1
Extended Photoperiod (23L:1D)								Normal Photoperiod (12L:12D)
OTU	Phylum	Class	Order	Family	Genus			OTU	Phylum	Class	Order	Family	Genus
Otu0001	Firmicutes	Clostridia	Clostridiales	Ruminococcaceae	Faecalibacterium			Otu0001	Firmicutes	Clostridia	Clostridiales	Ruminococcaceae	Faecalibacterium
Otu0002	Firmicutes	Clostridia	Clostridiales	Lachnospiraceae	Lachnoclostridium			Otu0002	Firmicutes	Clostridia	Clostridiales	Lachnospiraceae	Lachnoclostridium
Otu0003	Firmicutes	Bacilli	Lactobacillales	Lactobacillaceae	Lactobacillus			Otu0003	Firmicutes	Bacilli	Lactobacillales	Lactobacillaceae	Lactobacillus
Otu0004	Firmicutes	Clostridia	Clostridiales	Ruminococcaceae	Ruminococcaceae_UCG-014			Otu0004	Firmicutes	Clostridia	Clostridiales	Ruminococcaceae	Ruminococcaceae_UCG-014
Otu0005	Firmicutes	Clostridia	Clostridiales	Ruminococcaceae	Anaerotruncus			Otu0005	Firmicutes	Clostridia	Clostridiales	Ruminococcaceae	Anaerotruncus
Otu0006	Firmicutes	Clostridia	Clostridiales	Lachnospiraceae	NA			Otu0006	Firmicutes	Clostridia	Clostridiales	Lachnospiraceae	NA
Otu0007	Firmicutes	Clostridia	Clostridiales	Ruminococcaceae	Subdoligranulum			Otu0007	Firmicutes	Clostridia	Clostridiales	Ruminococcaceae	Subdoligranulum
Otu0008	Firmicutes	Clostridia	Clostridiales	Ruminococcaceae	Ruminiclostridium_9			Otu0008	Firmicutes	Clostridia	Clostridiales	Ruminococcaceae	Ruminiclostridium_9
Otu0009	Firmicutes	Clostridia	Clostridiales	Lachnospiraceae	NA			Otu0009	Firmicutes	Clostridia	Clostridiales	Lachnospiraceae	NA
Otu0010	Firmicutes	Clostridia	Clostridiales	Lachnospiraceae	Eisenbergiella			Otu0010	Firmicutes	Clostridia	Clostridiales	Lachnospiraceae	Eisenbergiella
Otu0011	Firmicutes	Clostridia	Clostridiales	Ruminococcaceae	Flavonifractor			Otu0011	Firmicutes	Clostridia	Clostridiales	Ruminococcaceae	Flavonifractor
Otu0012	Firmicutes	Clostridia	Clostridiales	Lachnospiraceae	Tyzzerella			Otu0012	Firmicutes	Clostridia	Clostridiales	Lachnospiraceae	Tyzzerella
Otu0013	Firmicutes	Bacilli	Lactobacillales	Lactobacillaceae	Lactobacillus			Otu0013	Firmicutes	Bacilli	Lactobacillales	Lactobacillaceae	Lactobacillus
Otu0014	Firmicutes	Clostridia	Clostridiales	Clostridiaceae_1	Candidatus_Arthromitus			Otu0014	Firmicutes	Clostridia	Clostridiales	Clostridiaceae_1	Candidatus_Arthromitus
Otu0015	Firmicutes	Bacilli	Lactobacillales	Lactobacillaceae	Lactobacillus			Otu0015	Firmicutes	Bacilli	Lactobacillales	Lactobacillaceae	Lactobacillus
Otu0016	Firmicutes	Clostridia	Clostridiales	Lachnospiraceae	Lachnoclostridium			Otu0016	Firmicutes	Clostridia	Clostridiales	Lachnospiraceae	Lachnoclostridium
Otu0017	Firmicutes	Clostridia	Clostridiales	Ruminococcaceae	Ruminococcaceae_UCG-014			Otu0017	Firmicutes	Clostridia	Clostridiales	Ruminococcaceae	Ruminococcaceae_UCG-014
Otu0018	Firmicutes	Clostridia	Clostridiales	Ruminococcaceae	NA			Otu0018	Firmicutes	Clostridia	Clostridiales	Ruminococcaceae	NA
Otu0019	Firmicutes	Clostridia	Clostridiales	Clostridiaceae_1	Clostridium_sensu_stricto_1			Otu0019	Firmicutes	Clostridia	Clostridiales	Clostridiaceae_1	Clostridium_sensu_stricto_1
Otu0020	Firmicutes	Clostridia	Clostridiales	Lachnospiraceae	Coprococcus_1			Otu0020	Firmicutes	Clostridia	Clostridiales	Lachnospiraceae	Coprococcus_1
Otu0021	Bacteroidetes	Bacteroidia	Bacteroidales	Rikenellaceae	Alistipes			Otu0021	Bacteroidetes	Bacteroidia	Bacteroidales	Rikenellaceae	Alistipes
Otu0022	Firmicutes	Bacilli	Lactobacillales	Lactobacillaceae	Lactobacillus			Otu0022	Firmicutes	Bacilli	Lactobacillales	Lactobacillaceae	Lactobacillus
Otu0023	Firmicutes	Clostridia	Clostridiales	Ruminococcaceae	Pseudoflavonifractor			Otu0023	Firmicutes	Clostridia	Clostridiales	Ruminococcaceae	Pseudoflavonifractor
Otu0024	Firmicutes	Clostridia	Clostridiales	Ruminococcaceae	Ruminococcaceae_UCG-008			Otu0024	Firmicutes	Clostridia	Clostridiales	Ruminococcaceae	Ruminococcaceae_UCG-008
Otu0025	Firmicutes	Clostridia	Clostridiales	Lachnospiraceae	Shuttleworthia			Otu0025	Firmicutes	Clostridia	Clostridiales	Lachnospiraceae	Shuttleworthia
Otu0026	Firmicutes	Clostridia	Clostridiales	Ruminococcaceae	NA			Otu0026	Firmicutes	Clostridia	Clostridiales	Ruminococcaceae	NA
Otu0027	Firmicutes	Clostridia	Clostridiales	Ruminococcaceae	NA			Otu0027	Firmicutes	Clostridia	Clostridiales	Ruminococcaceae	NA
Otu0028	Firmicutes	Clostridia	Clostridiales	Clostridiales_vadinBB60_group	NA			Otu0028	Firmicutes	Clostridia	Clostridiales	Clostridiales_vadinBB60_group	NA
Otu0029	Firmicutes	Clostridia	Clostridiales	Ruminococcaceae	NA			Otu0029	Firmicutes	Clostridia	Clostridiales	Ruminococcaceae	NA
Otu0030	Firmicutes	Bacilli	Bacillales	Bacillales_unclassified	NA			Otu0030	Firmicutes	Bacilli	Bacillales	Bacillales_unclassified	NA
Otu0031	Firmicutes	Clostridia	Clostridiales	Lachnospiraceae	NA			Otu0031	Firmicutes	Clostridia	Clostridiales	Lachnospiraceae	NA
Otu0032	Firmicutes	Clostridia	Clostridiales	Lachnospiraceae	NA			Otu0032	Firmicutes	Clostridia	Clostridiales	Lachnospiraceae	NA
Otu0033	Firmicutes	Clostridia	Clostridiales	Ruminococcaceae	Ruminococcaceae_UCG-014			Otu0033	Firmicutes	Clostridia	Clostridiales	Ruminococcaceae	Ruminococcaceae_UCG-014
Otu0034	Firmicutes	Clostridia	Clostridiales	Ruminococcaceae	Anaerotruncus			Otu0034	Firmicutes	Clostridia	Clostridiales	Ruminococcaceae	Anaerotruncus
Otu0035	Firmicutes	Clostridia	Clostridiales	Ruminococcaceae	[Eubacterium]_coprostanoligenes_group			Otu0035	Firmicutes	Clostridia	Clostridiales	Ruminococcaceae	[Eubacterium]_coprostanoligenes_group
Otu0036	Firmicutes	Clostridia	Clostridiales	Clostridiales_vadinBB60_group	NA			Otu0036	Firmicutes	Clostridia	Clostridiales	Clostridiales_vadinBB60_group	NA
Otu0037	Firmicutes	Clostridia	Clostridiales	Ruminococcaceae	Flavonifractor			Otu0037	Firmicutes	Clostridia	Clostridiales	Ruminococcaceae	Flavonifractor
Otu0038	Firmicutes	Clostridia	Clostridiales	Lachnospiraceae	Fusicatenibacter			Otu0038	Firmicutes	Clostridia	Clostridiales	Lachnospiraceae	Fusicatenibacter
Otu0039	Firmicutes	Erysipelotrichia	Erysipelotrichales	Erysipelotrichaceae	Erysipelatoclostridium			Otu0039	Firmicutes	Erysipelotrichia	Erysipelotrichales	Erysipelotrichaceae	Erysipelatoclostridium
Otu0040	Firmicutes	Clostridia	Clostridiales	Ruminococcaceae	Oscillibacter			Otu0040	Firmicutes	Clostridia	Clostridiales	Ruminococcaceae	Oscillibacter
Otu0041	Firmicutes	Clostridia	Clostridiales	Clostridiales_vadinBB60_group	NA			Otu0041	Firmicutes	Clostridia	Clostridiales	Clostridiales_vadinBB60_group	NA
Otu0042	Firmicutes	Clostridia	Clostridiales	Ruminococcaceae	Ruminococcaceae_UCG-014			Otu0042	Firmicutes	Clostridia	Clostridiales	Ruminococcaceae	Ruminococcaceae_UCG-014
Otu0043	Firmicutes	Clostridia	Clostridiales	Clostridiales_vadinBB60_group	NA			Otu0043	Firmicutes	Clostridia	Clostridiales	Clostridiales_vadinBB60_group	NA
Otu0044	Firmicutes	Clostridia	Clostridiales	Lachnospiraceae	NA			Otu0044	Firmicutes	Clostridia	Clostridiales	Lachnospiraceae	NA
Otu0045	Firmicutes	Clostridia	Clostridiales	Ruminococcaceae	Ruminococcaceae_UCG-014			Otu0045	Firmicutes	Clostridia	Clostridiales	Ruminococcaceae	Ruminococcaceae_UCG-014
Otu0046	Actinobacteria	Coriobacteriia	Coriobacteriales	Coriobacteriaceae	NA			Otu0046	Actinobacteria	Coriobacteriia	Coriobacteriales	Coriobacteriaceae	NA
Otu0047	Firmicutes	Clostridia	Clostridiales	Ruminococcaceae	Ruminococcaceae_UCG-014			Otu0047	Firmicutes	Clostridia	Clostridiales	Ruminococcaceae	Ruminococcaceae_UCG-014
Otu0048	Firmicutes	Clostridia	Clostridiales	Ruminococcaceae	[Eubacterium]_coprostanoligenes_group			Otu0048	Firmicutes	Clostridia	Clostridiales	Ruminococcaceae	[Eubacterium]_coprostanoligenes_group
Otu0049	Firmicutes	Clostridia	Clostridiales	Clostridiales_vadinBB60_group	NA			Otu0049	Firmicutes	Clostridia	Clostridiales	Clostridiales_vadinBB60_group	NA
Otu0050	Firmicutes	Clostridia	Clostridiales	Ruminococcaceae	Ruminococcaceae_UCG-014			Otu0050	Firmicutes	Clostridia	Clostridiales	Ruminococcaceae	Ruminococcaceae_UCG-014
Otu0051	Tenericutes	Mollicutes	Mollicutes_RF9	Mollicutes_RF9_unclassified	NA			Otu0051	Tenericutes	Mollicutes	Mollicutes_RF9	Mollicutes_RF9_unclassified	NA
Otu0052	Firmicutes	Clostridia	Clostridiales	Ruminococcaceae	Ruminiclostridium_5			Otu0052	Firmicutes	Clostridia	Clostridiales	Ruminococcaceae	Ruminiclostridium_5
Otu0053	Firmicutes	Clostridia	Clostridiales	Ruminococcaceae	[Eubacterium]_coprostanoligenes_group			Otu0053	Firmicutes	Clostridia	Clostridiales	Ruminococcaceae	[Eubacterium]_coprostanoligenes_group
Otu0054	Firmicutes	Clostridia	Clostridiales	Ruminococcaceae	Anaerotruncus			Otu0054	Firmicutes	Clostridia	Clostridiales	Ruminococcaceae	Anaerotruncus
Otu0055	Firmicutes	Clostridia	Clostridiales	Ruminococcaceae	Ruminococcaceae_UCG-005			Otu0055	Firmicutes	Clostridia	Clostridiales	Ruminococcaceae	Ruminococcaceae_UCG-005
Otu0056	Firmicutes	Clostridia	Clostridiales	Lachnospiraceae	NA			Otu0056	Firmicutes	Clostridia	Clostridiales	Lachnospiraceae	NA
Otu0057	Firmicutes	Clostridia	Clostridiales	Ruminococcaceae	Anaerotruncus			Otu0057	Firmicutes	Clostridia	Clostridiales	Ruminococcaceae	Anaerotruncus
Otu0058	Firmicutes	Clostridia	Clostridiales	Lachnospiraceae	NA			Otu0058	Firmicutes	Clostridia	Clostridiales	Lachnospiraceae	NA
Otu0059	Tenericutes	Mollicutes	Anaeroplasmatales	Anaeroplasmataceae	Anaeroplasma			Otu0059	Tenericutes	Mollicutes	Anaeroplasmatales	Anaeroplasmataceae	Anaeroplasma
Otu0060	Firmicutes	Clostridia	Clostridiales	Lachnospiraceae	NA			Otu0060	Firmicutes	Clostridia	Clostridiales	Lachnospiraceae	NA
Otu0061	Firmicutes	Clostridia	Clostridiales	Ruminococcaceae	NA			Otu0061	Firmicutes	Clostridia	Clostridiales	Ruminococcaceae	NA
Otu0062	Firmicutes	Clostridia	Clostridiales	Ruminococcaceae	Ruminiclostridium_5			Otu0062	Firmicutes	Clostridia	Clostridiales	Ruminococcaceae	Ruminiclostridium_5
Otu0063	Firmicutes	Clostridia	Clostridiales	Ruminococcaceae	Pseudoflavonifractor			Otu0063	Firmicutes	Clostridia	Clostridiales	Ruminococcaceae	Pseudoflavonifractor
Otu0064	Firmicutes	Clostridia	Clostridiales	Ruminococcaceae	Ruminococcaceae_UCG-014			Otu0064	Firmicutes	Clostridia	Clostridiales	Ruminococcaceae	Ruminococcaceae_UCG-014
Otu0065	Firmicutes	Clostridia	Clostridiales	Clostridiales_unclassified	NA			Otu0065	Firmicutes	Clostridia	Clostridiales	Clostridiales_unclassified	NA
Otu0066	Firmicutes	Clostridia	Clostridiales	Ruminococcaceae	Anaerotruncus			Otu0066	Firmicutes	Clostridia	Clostridiales	Ruminococcaceae	Anaerotruncus
Otu0067	Firmicutes	Clostridia	Clostridiales	Ruminococcaceae	Ruminococcaceae_UCG-005			Otu0067	Firmicutes	Clostridia	Clostridiales	Ruminococcaceae	Ruminococcaceae_UCG-005
Otu0068	Proteobacteria	Gammaproteobacteria	Enterobacteriales	Enterobacteriaceae	Escherichia-Shigella			Otu0068	Proteobacteria	Gammaproteobacteria	Enterobacteriales	Enterobacteriaceae	Escherichia-Shigella
Otu0069	Firmicutes	Clostridia	Clostridiales	Ruminococcaceae	Ruminococcaceae_UCG-014			Otu0069	Firmicutes	Clostridia	Clostridiales	Ruminococcaceae	Ruminococcaceae_UCG-014
Otu0070	Firmicutes	Clostridia	Clostridiales	Ruminococcaceae	Ruminiclostridium_5			Otu0070	Firmicutes	Clostridia	Clostridiales	Ruminococcaceae	Ruminiclostridium_5
Otu0071	Firmicutes	Clostridia	Clostridiales	Lachnospiraceae	Anaerostipes			Otu0071	Firmicutes	Clostridia	Clostridiales	Lachnospiraceae	Anaerostipes
Otu0072	Cyanobacteria	Melainabacteria	Gastranaerophilales	Gastranaerophilales_unclassified	NA			Otu0072	Cyanobacteria	Melainabacteria	Gastranaerophilales	Gastranaerophilales_unclassified	NA
Otu0073	Firmicutes	Clostridia	Clostridiales	Lachnospiraceae	[Eubacterium]_hallii_group			Otu0073	Firmicutes	Clostridia	Clostridiales	Lachnospiraceae	[Eubacterium]_hallii_group
Otu0074	Firmicutes	Clostridia	Clostridiales	Lachnospiraceae	Lachnoclostridium			Otu0074	Firmicutes	Clostridia	Clostridiales	Lachnospiraceae	Lachnoclostridium
Otu0075	Firmicutes	Clostridia	Clostridiales	Lachnospiraceae	Lachnoclostridium			Otu0075	Firmicutes	Clostridia	Clostridiales	Lachnospiraceae	Lachnoclostridium
Otu0076	Firmicutes	Clostridia	Clostridiales	Ruminococcaceae	Ruminiclostridium_9			Otu0076	Firmicutes	Clostridia	Clostridiales	Ruminococcaceae	Ruminiclostridium_9
Otu0077	Firmicutes	Clostridia	Clostridiales	Lachnospiraceae	NA			Otu0077	Firmicutes	Clostridia	Clostridiales	Lachnospiraceae	NA
Otu0078	Firmicutes	Erysipelotrichia	Erysipelotrichales	Erysipelotrichaceae	Erysipelatoclostridium			Otu0078	Firmicutes	Erysipelotrichia	Erysipelotrichales	Erysipelotrichaceae	Erysipelatoclostridium
Otu0079	Bacteria_unclassified	Bacteria_unclassified	Bacteria_unclassified	Bacteria_unclassified	NA			Otu0080	Firmicutes	Erysipelotrichia	Erysipelotrichales	Erysipelotrichaceae	Erysipelatoclostridium
Otu0080	Firmicutes	Erysipelotrichia	Erysipelotrichales	Erysipelotrichaceae	Erysipelatoclostridium			Otu0081	Firmicutes	Clostridia	Clostridiales	Clostridiales_vadinBB60_group	NA
Otu0081	Firmicutes	Clostridia	Clostridiales	Clostridiales_vadinBB60_group	NA			Otu0082	Firmicutes	Clostridia	Clostridiales	Ruminococcaceae	NA
Otu0082	Firmicutes	Clostridia	Clostridiales	Ruminococcaceae	NA			Otu0083	Firmicutes	Clostridia	Clostridiales	Clostridiales_vadinBB60_group	NA
Otu0083	Firmicutes	Clostridia	Clostridiales	Clostridiales_vadinBB60_group	NA			Otu0084	Firmicutes	Clostridia	Clostridiales	Ruminococcaceae	NA
Otu0084	Firmicutes	Clostridia	Clostridiales	Ruminococcaceae	NA			Otu0085	Firmicutes	Clostridia	Clostridiales	Ruminococcaceae	Faecalibacterium
Otu0085	Firmicutes	Clostridia	Clostridiales	Ruminococcaceae	Faecalibacterium			Otu0086	Firmicutes	Clostridia	Clostridiales	Ruminococcaceae	NA
Otu0086	Firmicutes	Clostridia	Clostridiales	Ruminococcaceae	NA			Otu0087	Firmicutes	Clostridia	Clostridiales	Ruminococcaceae	Ruminococcaceae_UCG-014
Otu0087	Firmicutes	Clostridia	Clostridiales	Ruminococcaceae	Ruminococcaceae_UCG-014			Otu0088	Firmicutes	Clostridia	Clostridiales	Ruminococcaceae	Oscillibacter
Otu0088	Firmicutes	Clostridia	Clostridiales	Ruminococcaceae	Oscillibacter			Otu0089	Firmicutes	Clostridia	Clostridiales	Lachnospiraceae	Tyzzerella
Otu0089	Firmicutes	Clostridia	Clostridiales	Lachnospiraceae	Tyzzerella			Otu0090	Firmicutes	Clostridia	Clostridiales	Ruminococcaceae	Anaerotruncus
Otu0090	Firmicutes	Clostridia	Clostridiales	Ruminococcaceae	Anaerotruncus			Otu0091	Firmicutes	Clostridia	Clostridiales	Lachnospiraceae	NA
Otu0091	Firmicutes	Clostridia	Clostridiales	Lachnospiraceae	NA			Otu0092	Bacteria_unclassified	Bacteria_unclassified	Bacteria_unclassified	Bacteria_unclassified	NA
Otu0092	Bacteria_unclassified	Bacteria_unclassified	Bacteria_unclassified	Bacteria_unclassified	NA			Otu0093	Firmicutes	Clostridia	Clostridiales	Peptostreptococcaceae	NA
Otu0093	Firmicutes	Clostridia	Clostridiales	Peptostreptococcaceae	NA			Otu0094	Firmicutes	Clostridia	Clostridiales	Ruminococcaceae	Oscillospira
Otu0094	Firmicutes	Clostridia	Clostridiales	Ruminococcaceae	Oscillospira			Otu0095	Firmicutes	Clostridia	Clostridiales	Ruminococcaceae	NA
Otu0095	Firmicutes	Clostridia	Clostridiales	Ruminococcaceae	NA			Otu0096	Firmicutes	Firmicutes_unclassified	Firmicutes_unclassified	Firmicutes_unclassified	NA
Otu0096	Firmicutes	Firmicutes_unclassified	Firmicutes_unclassified	Firmicutes_unclassified	NA			Otu0097	Firmicutes	Clostridia	Clostridiales	Ruminococcaceae	Ruminococcus_1
Otu0097	Firmicutes	Clostridia	Clostridiales	Ruminococcaceae	Ruminococcus_1			Otu0098	Firmicutes	Clostridia	Clostridiales	Ruminococcaceae	NA
Otu0098	Firmicutes	Clostridia	Clostridiales	Ruminococcaceae	NA			Otu0099	Firmicutes	Clostridia	Clostridiales	Ruminococcaceae	Ruminococcaceae_UCG-014
Otu0099	Firmicutes	Clostridia	Clostridiales	Ruminococcaceae	Ruminococcaceae_UCG-014			Otu0100	Firmicutes	Clostridia	Clostridiales	Lachnospiraceae	Blautia
Otu0100	Firmicutes	Clostridia	Clostridiales	Lachnospiraceae	Blautia			Otu0101	Firmicutes	Clostridia	Clostridiales	Ruminococcaceae	Ruminiclostridium_5
Otu0101	Firmicutes	Clostridia	Clostridiales	Ruminococcaceae	Ruminiclostridium_5			Otu0102	Firmicutes	Clostridia	Clostridiales	Ruminococcaceae	Ruminococcaceae_UCG-014
Otu0102	Firmicutes	Clostridia	Clostridiales	Ruminococcaceae	Ruminococcaceae_UCG-014			Otu0103	Firmicutes	Clostridia	Clostridiales	Lachnospiraceae	NA
Otu0103	Firmicutes	Clostridia	Clostridiales	Lachnospiraceae	NA			Otu0104	Firmicutes	Clostridia	Clostridiales	Ruminococcaceae	Ruminococcaceae_UCG-014
Otu0104	Firmicutes	Clostridia	Clostridiales	Ruminococcaceae	Ruminococcaceae_UCG-014			Otu0105	Firmicutes	Erysipelotrichia	Erysipelotrichales	Erysipelotrichaceae	NA
Otu0105	Firmicutes	Erysipelotrichia	Erysipelotrichales	Erysipelotrichaceae	NA			Otu0106	Firmicutes	Clostridia	Clostridiales	Lachnospiraceae	Lachnospira
Otu0106	Firmicutes	Clostridia	Clostridiales	Lachnospiraceae	Lachnospira			Otu0107	Firmicutes	Clostridia	Clostridiales	Lachnospiraceae	Lachnoclostridium
Otu0107	Firmicutes	Clostridia	Clostridiales	Lachnospiraceae	Lachnoclostridium			Otu0108	Firmicutes	Clostridia	Clostridiales	Ruminococcaceae	Ruminococcaceae_UCG-014
Otu0108	Firmicutes	Clostridia	Clostridiales	Ruminococcaceae	Ruminococcaceae_UCG-014			Otu0109	Firmicutes	Clostridia	Clostridiales	Ruminococcaceae	Ruminococcaceae_UCG-014
Otu0109	Firmicutes	Clostridia	Clostridiales	Ruminococcaceae	Ruminococcaceae_UCG-014			Otu0110	Firmicutes	Clostridia	Clostridiales	Ruminococcaceae	Anaerotruncus
Otu0110	Firmicutes	Clostridia	Clostridiales	Ruminococcaceae	Anaerotruncus			Otu0111	Firmicutes	Clostridia	Clostridiales	Lachnospiraceae	Lachnospiraceae_UCG-010
Otu0111	Firmicutes	Clostridia	Clostridiales	Lachnospiraceae	Lachnospiraceae_UCG-010			Otu0112	Tenericutes	Mollicutes	Mollicutes_RF9	Mollicutes_RF9_unclassified	NA
Otu0112	Tenericutes	Mollicutes	Mollicutes_RF9	Mollicutes_RF9_unclassified	NA			Otu0113	Firmicutes	Clostridia	Clostridiales	Lachnospiraceae	NA
Otu0113	Firmicutes	Clostridia	Clostridiales	Lachnospiraceae	NA			Otu0114	Firmicutes	Clostridia	Clostridiales	Ruminococcaceae	Ruminiclostridium_5
Otu0114	Firmicutes	Clostridia	Clostridiales	Ruminococcaceae	Ruminiclostridium_5			Otu0115	Firmicutes	Clostridia	Clostridiales	Ruminococcaceae	Ruminiclostridium_5
Otu0115	Firmicutes	Clostridia	Clostridiales	Ruminococcaceae	Ruminiclostridium_5			Otu0116	Firmicutes	Clostridia	Clostridiales	Lachnospiraceae	NA
Otu0116	Firmicutes	Clostridia	Clostridiales	Lachnospiraceae	NA			Otu0117	Firmicutes	Clostridia	Clostridiales	Clostridiales_vadinBB60_group	NA
Otu0117	Firmicutes	Clostridia	Clostridiales	Clostridiales_vadinBB60_group	NA			Otu0118	Firmicutes	Clostridia	Clostridiales	Lachnospiraceae	Lachnospiraceae_FCS020_group
Otu0118	Firmicutes	Clostridia	Clostridiales	Lachnospiraceae	Lachnospiraceae_FCS020_group			Otu0119	Firmicutes	Clostridia	Clostridiales	Clostridiales_vadinBB60_group	NA
Otu0119	Firmicutes	Clostridia	Clostridiales	Clostridiales_vadinBB60_group	NA			Otu0120	Firmicutes	Clostridia	Clostridiales	Clostridiales_unclassified	NA
Otu0120	Firmicutes	Clostridia	Clostridiales	Clostridiales_unclassified	NA			Otu0121	Firmicutes	Clostridia	Clostridiales	Ruminococcaceae	Ruminiclostridium_5
Otu0121	Firmicutes	Clostridia	Clostridiales	Ruminococcaceae	Ruminiclostridium_5			Otu0122	Firmicutes	Clostridia	Clostridiales	Peptostreptococcaceae	NA
Otu0122	Firmicutes	Clostridia	Clostridiales	Peptostreptococcaceae	NA			Otu0123	Firmicutes	Clostridia	Clostridiales	Ruminococcaceae	Ruminococcaceae_UCG-004
Otu0123	Firmicutes	Clostridia	Clostridiales	Ruminococcaceae	Ruminococcaceae_UCG-004			Otu0124	Firmicutes	Clostridia	Clostridiales	Lachnospiraceae	Lachnospiraceae_UCG-010
Otu0124	Firmicutes	Clostridia	Clostridiales	Lachnospiraceae	Lachnospiraceae_UCG-010			Otu0125	Firmicutes	Clostridia	Clostridiales	Ruminococcaceae	Ruminococcaceae_UCG-002
Otu0125	Firmicutes	Clostridia	Clostridiales	Ruminococcaceae	Ruminococcaceae_UCG-002			Otu0126	Firmicutes	Clostridia	Clostridiales	Lachnospiraceae	NA
Otu0126	Firmicutes	Clostridia	Clostridiales	Lachnospiraceae	NA			Otu0127	Firmicutes	Clostridia	Clostridiales	Lachnospiraceae	NA
Otu0127	Firmicutes	Clostridia	Clostridiales	Lachnospiraceae	NA			Otu0128	Firmicutes	Clostridia	Clostridiales	Lachnospiraceae	NA
Otu0128	Firmicutes	Clostridia	Clostridiales	Lachnospiraceae	NA			Otu0129	Tenericutes	Mollicutes	Mollicutes_RF9	Mollicutes_RF9_unclassified	NA
Otu0129	Tenericutes	Mollicutes	Mollicutes_RF9	Mollicutes_RF9_unclassified	NA			Otu0130	Firmicutes	Clostridia	Clostridiales	Clostridiales_vadinBB60_group	NA
Otu0130	Firmicutes	Clostridia	Clostridiales	Clostridiales_vadinBB60_group	NA			Otu0132	Firmicutes	Clostridia	Clostridiales	Ruminococcaceae	Ruminococcaceae_UCG-014
Otu0132	Firmicutes	Clostridia	Clostridiales	Ruminococcaceae	Ruminococcaceae_UCG-014			Otu0133	Firmicutes	Bacilli	Lactobacillales	Enterococcaceae	Enterococcus
Otu0133	Firmicutes	Bacilli	Lactobacillales	Enterococcaceae	Enterococcus			Otu0134	Firmicutes	Erysipelotrichia	Erysipelotrichales	Erysipelotrichaceae	NA
Otu0134	Firmicutes	Erysipelotrichia	Erysipelotrichales	Erysipelotrichaceae	NA			Otu0136	Firmicutes	Clostridia	Clostridiales	Lachnospiraceae	NA
Otu0136	Firmicutes	Clostridia	Clostridiales	Lachnospiraceae	NA			Otu0137	Firmicutes	Clostridia	Clostridiales	Lachnospiraceae	Lachnospiraceae_UCG-010
Otu0137	Firmicutes	Clostridia	Clostridiales	Lachnospiraceae	Lachnospiraceae_UCG-010			Otu0138	Firmicutes	Clostridia	Clostridiales	Ruminococcaceae	NA
Otu0138	Firmicutes	Clostridia	Clostridiales	Ruminococcaceae	NA			Otu0139	Bacteria_unclassified	Bacteria_unclassified	Bacteria_unclassified	Bacteria_unclassified	NA
Otu0139	Bacteria_unclassified	Bacteria_unclassified	Bacteria_unclassified	Bacteria_unclassified	NA			Otu0140	Proteobacteria	Gammaproteobacteria	Enterobacteriales	Enterobacteriaceae	NA
Otu0140	Proteobacteria	Gammaproteobacteria	Enterobacteriales	Enterobacteriaceae	NA			Otu0141	Firmicutes	Clostridia	Clostridiales	Ruminococcaceae	Anaerotruncus
Otu0141	Firmicutes	Clostridia	Clostridiales	Ruminococcaceae	Anaerotruncus			Otu0142	Firmicutes	Clostridia	Clostridiales	Lachnospiraceae	Tyzzerella_3
Otu0142	Firmicutes	Clostridia	Clostridiales	Lachnospiraceae	Tyzzerella_3			Otu0143	Firmicutes	Clostridia	Clostridiales	Lachnospiraceae	NA
Otu0143	Firmicutes	Clostridia	Clostridiales	Lachnospiraceae	NA			Otu0144	Bacteria_unclassified	Bacteria_unclassified	Bacteria_unclassified	Bacteria_unclassified	NA
Otu0144	Bacteria_unclassified	Bacteria_unclassified	Bacteria_unclassified	Bacteria_unclassified	NA			Otu0145	Firmicutes	Clostridia	Clostridiales	Lachnospiraceae	NA
Otu0145	Firmicutes	Clostridia	Clostridiales	Lachnospiraceae	NA			Otu0146	Firmicutes	Clostridia	Clostridiales	Ruminococcaceae	Ruminiclostridium_5
Otu0146	Firmicutes	Clostridia	Clostridiales	Ruminococcaceae	Ruminiclostridium_5			Otu0147	Tenericutes	Mollicutes	Mollicutes_RF9	Mollicutes_RF9_unclassified	NA
Otu0147	Tenericutes	Mollicutes	Mollicutes_RF9	Mollicutes_RF9_unclassified	NA			Otu0148	Tenericutes	Mollicutes	Mollicutes_RF9	Mollicutes_RF9_unclassified	NA
Otu0148	Tenericutes	Mollicutes	Mollicutes_RF9	Mollicutes_RF9_unclassified	NA			Otu0149	Firmicutes	Clostridia	Clostridiales	Family_XIII	NA
Otu0149	Firmicutes	Clostridia	Clostridiales	Family_XIII	NA			Otu0150	Firmicutes	Clostridia	Clostridiales	Christensenellaceae	Christensenellaceae_R-7_group
Otu0150	Firmicutes	Clostridia	Clostridiales	Christensenellaceae	Christensenellaceae_R-7_group			Otu0151	Firmicutes	Clostridia	Clostridiales	Lachnospiraceae	NA
Otu0151	Firmicutes	Clostridia	Clostridiales	Lachnospiraceae	NA			Otu0152	Firmicutes	Clostridia	Clostridiales	Ruminococcaceae	Anaerotruncus
Otu0152	Firmicutes	Clostridia	Clostridiales	Ruminococcaceae	Anaerotruncus			Otu0153	Firmicutes	Clostridia	Clostridiales	Defluviitaleaceae	Defluviitaleaceae_UCG-011
Otu0153	Firmicutes	Clostridia	Clostridiales	Defluviitaleaceae	Defluviitaleaceae_UCG-011			Otu0154	Firmicutes	Clostridia	Clostridiales	Ruminococcaceae	Anaerotruncus
Otu0154	Firmicutes	Clostridia	Clostridiales	Ruminococcaceae	Anaerotruncus			Otu0155	Firmicutes	Clostridia	Clostridiales	Lachnospiraceae	Coprococcus_1
Otu0155	Firmicutes	Clostridia	Clostridiales	Lachnospiraceae	Coprococcus_1			Otu0156	Firmicutes	Clostridia	Clostridiales	Lachnospiraceae	Lachnospiraceae_NC2004_group
Otu0156	Firmicutes	Clostridia	Clostridiales	Lachnospiraceae	Lachnospiraceae_NC2004_group			Otu0157	Firmicutes	Erysipelotrichia	Erysipelotrichales	Erysipelotrichaceae	NA
Otu0157	Firmicutes	Erysipelotrichia	Erysipelotrichales	Erysipelotrichaceae	NA			Otu0158	Firmicutes	Clostridia	Clostridiales	Family_XIII	NA
Otu0158	Firmicutes	Clostridia	Clostridiales	Family_XIII	NA			Otu0159	Firmicutes	Clostridia	Clostridiales	Lachnospiraceae	NA
Otu0159	Firmicutes	Clostridia	Clostridiales	Lachnospiraceae	NA			Otu0160	Firmicutes	Erysipelotrichia	Erysipelotrichales	Erysipelotrichaceae	NA
Otu0160	Firmicutes	Erysipelotrichia	Erysipelotrichales	Erysipelotrichaceae	NA			Otu0161	Firmicutes	Clostridia	Clostridiales	Ruminococcaceae	NA
Otu0161	Firmicutes	Clostridia	Clostridiales	Ruminococcaceae	NA			Otu0162	Firmicutes	Clostridia	Clostridiales	Lachnospiraceae	NA
Otu0162	Firmicutes	Clostridia	Clostridiales	Lachnospiraceae	NA			Otu0163	Firmicutes	Clostridia	Clostridiales	Lachnospiraceae	NA
Otu0163	Firmicutes	Clostridia	Clostridiales	Lachnospiraceae	NA			Otu0164	Firmicutes	Clostridia	Clostridiales	Ruminococcaceae	Ruminococcaceae_UCG-013
Otu0164	Firmicutes	Clostridia	Clostridiales	Ruminococcaceae	Ruminococcaceae_UCG-013			Otu0165	Firmicutes	Clostridia	Clostridiales	Lachnospiraceae	NA
Otu0165	Firmicutes	Clostridia	Clostridiales	Lachnospiraceae	NA			Otu0166	Firmicutes	Clostridia	Clostridiales	Peptostreptococcaceae	Terrisporobacter
Otu0166	Firmicutes	Clostridia	Clostridiales	Peptostreptococcaceae	Terrisporobacter			Otu0167	Firmicutes	Clostridia	Clostridiales	Ruminococcaceae	Ruminiclostridium_5
Otu0167	Firmicutes	Clostridia	Clostridiales	Ruminococcaceae	Ruminiclostridium_5			Otu0168	Firmicutes	Clostridia	Clostridiales	Ruminococcaceae	Ruminococcaceae_UCG-010
Otu0168	Firmicutes	Clostridia	Clostridiales	Ruminococcaceae	Ruminococcaceae_UCG-010			Otu0169	Firmicutes	Clostridia	Clostridiales	Christensenellaceae	Christensenellaceae_R-7_group
Otu0169	Firmicutes	Clostridia	Clostridiales	Christensenellaceae	Christensenellaceae_R-7_group			Otu0170	Tenericutes	Mollicutes	Mollicutes_RF9	Mollicutes_RF9_unclassified	NA
Otu0170	Tenericutes	Mollicutes	Mollicutes_RF9	Mollicutes_RF9_unclassified	NA			Otu0171	Firmicutes	Clostridia	Clostridiales	Lachnospiraceae	NA
Otu0171	Firmicutes	Clostridia	Clostridiales	Lachnospiraceae	NA			Otu0172	Firmicutes	Clostridia	Clostridiales	Christensenellaceae	Christensenellaceae_R-7_group
Otu0172	Firmicutes	Clostridia	Clostridiales	Christensenellaceae	Christensenellaceae_R-7_group			Otu0173	Bacteria_unclassified	Bacteria_unclassified	Bacteria_unclassified	Bacteria_unclassified	NA
Otu0173	Bacteria_unclassified	Bacteria_unclassified	Bacteria_unclassified	Bacteria_unclassified	NA			Otu0174	Firmicutes	Clostridia	Clostridiales	Lachnospiraceae	NA
Otu0174	Firmicutes	Clostridia	Clostridiales	Lachnospiraceae	NA			Otu0175	Firmicutes	Clostridia	Clostridiales	Lachnospiraceae	Blautia
Otu0175	Firmicutes	Clostridia	Clostridiales	Lachnospiraceae	Blautia			Otu0176	Firmicutes	Clostridia	Clostridiales	Clostridiales_unclassified	NA
Otu0176	Firmicutes	Clostridia	Clostridiales	Clostridiales_unclassified	NA			Otu0177	Firmicutes	Clostridia	Clostridiales	Lachnospiraceae	NA
Otu0177	Firmicutes	Clostridia	Clostridiales	Lachnospiraceae	NA			Otu0178	Firmicutes	Clostridia	Clostridiales	Ruminococcaceae	NA
Otu0178	Firmicutes	Clostridia	Clostridiales	Ruminococcaceae	NA			Otu0179	Firmicutes	Clostridia	Clostridiales	Ruminococcaceae	Ruminiclostridium_9
Otu0179	Firmicutes	Clostridia	Clostridiales	Ruminococcaceae	Ruminiclostridium_9			Otu0180	Firmicutes	Clostridia	Clostridiales	Ruminococcaceae	Ruminococcaceae_UCG-014
Otu0180	Firmicutes	Clostridia	Clostridiales	Ruminococcaceae	Ruminococcaceae_UCG-014			Otu0181	Firmicutes	Clostridia	Clostridiales	Ruminococcaceae	Ruminiclostridium_5
Otu0181	Firmicutes	Clostridia	Clostridiales	Ruminococcaceae	Ruminiclostridium_5			Otu0182	Firmicutes	Clostridia	Clostridiales	Ruminococcaceae	Ruminococcaceae_UCG-014
Otu0182	Firmicutes	Clostridia	Clostridiales	Ruminococcaceae	Ruminococcaceae_UCG-014			Otu0183	Firmicutes	Clostridia	Clostridiales	Lachnospiraceae	NA
Otu0183	Firmicutes	Clostridia	Clostridiales	Lachnospiraceae	NA			Otu0184	Firmicutes	Clostridia	Clostridiales	Lachnospiraceae	NA
Otu0184	Firmicutes	Clostridia	Clostridiales	Lachnospiraceae	NA			Otu0185	Firmicutes	Clostridia	Clostridiales	Christensenellaceae	Christensenellaceae_R-7_group
Otu0185	Firmicutes	Clostridia	Clostridiales	Christensenellaceae	Christensenellaceae_R-7_group			Otu0186	Firmicutes	Clostridia	Clostridiales	Lachnospiraceae	Tyzzerella
Otu0186	Firmicutes	Clostridia	Clostridiales	Lachnospiraceae	Tyzzerella			Otu0187	Firmicutes	Clostridia	Clostridiales	Ruminococcaceae	Ruminiclostridium_9
Otu0187	Firmicutes	Clostridia	Clostridiales	Ruminococcaceae	Ruminiclostridium_9			Otu0188	Tenericutes	Mollicutes	Mollicutes_RF9	Mollicutes_RF9_unclassified	NA
Otu0188	Tenericutes	Mollicutes	Mollicutes_RF9	Mollicutes_RF9_unclassified	NA			Otu0189	Firmicutes	Clostridia	Clostridiales	Ruminococcaceae	NA
Otu0189	Firmicutes	Clostridia	Clostridiales	Ruminococcaceae	NA			Otu0190	Firmicutes	Clostridia	Clostridiales	Ruminococcaceae	NA
Otu0190	Firmicutes	Clostridia	Clostridiales	Ruminococcaceae	NA			Otu0191	Firmicutes	Clostridia	Clostridiales	Clostridiales_unclassified	NA
Otu0191	Firmicutes	Clostridia	Clostridiales	Clostridiales_unclassified	NA			Otu0192	Firmicutes	Clostridia	Clostridiales	Lachnospiraceae	NA
Otu0192	Firmicutes	Clostridia	Clostridiales	Lachnospiraceae	NA			Otu0193	Firmicutes	Firmicutes_unclassified	Firmicutes_unclassified	Firmicutes_unclassified	NA
Otu0193	Firmicutes	Firmicutes_unclassified	Firmicutes_unclassified	Firmicutes_unclassified	NA			Otu0194	Actinobacteria	Coriobacteriia	Coriobacteriales	Coriobacteriaceae	Gordonibacter
Otu0194	Actinobacteria	Coriobacteriia	Coriobacteriales	Coriobacteriaceae	Gordonibacter			Otu0195	Firmicutes	Clostridia	Clostridiales	Ruminococcaceae	Ruminococcaceae_UCG-009
Otu0195	Firmicutes	Clostridia	Clostridiales	Ruminococcaceae	Ruminococcaceae_UCG-009			Otu0196	Actinobacteria	Coriobacteriia	Coriobacteriales	Coriobacteriaceae	Senegalimassilia
Otu0196	Actinobacteria	Coriobacteriia	Coriobacteriales	Coriobacteriaceae	Senegalimassilia			Otu0198	Firmicutes	Clostridia	Clostridiales	Lachnospiraceae	[Eubacterium]_hallii_group
Otu0197	Firmicutes	Clostridia	Clostridiales	Ruminococcaceae	Anaerotruncus			Otu0199	Firmicutes	Clostridia	Clostridiales	Ruminococcaceae	NA
Otu0198	Firmicutes	Clostridia	Clostridiales	Lachnospiraceae	[Eubacterium]_hallii_group			Otu0200	Firmicutes	Clostridia	Clostridiales	Lachnospiraceae	NA
Otu0199	Firmicutes	Clostridia	Clostridiales	Ruminococcaceae	NA			Otu0201	Firmicutes	Clostridia	Clostridiales	Ruminococcaceae	Anaerotruncus
Otu0200	Firmicutes	Clostridia	Clostridiales	Lachnospiraceae	NA			Otu0202	Firmicutes	Clostridia	Clostridiales	Ruminococcaceae	Ruminococcaceae_UCG-013
Otu0201	Firmicutes	Clostridia	Clostridiales	Ruminococcaceae	Anaerotruncus			Otu0203	Firmicutes	Clostridia	Clostridiales	Clostridiales_unclassified	NA
Otu0202	Firmicutes	Clostridia	Clostridiales	Ruminococcaceae	Ruminococcaceae_UCG-013			Otu0204	Firmicutes	Clostridia	Clostridiales	Lachnospiraceae	Lachnoclostridium
Otu0203	Firmicutes	Clostridia	Clostridiales	Clostridiales_unclassified	NA			Otu0205	Firmicutes	Clostridia	Clostridiales	Ruminococcaceae	[Eubacterium]_coprostanoligenes_group
Otu0204	Firmicutes	Clostridia	Clostridiales	Lachnospiraceae	Lachnoclostridium			Otu0206	Firmicutes	Clostridia	Clostridiales	Ruminococcaceae	Ruminococcaceae_NK4A214_group
Otu0205	Firmicutes	Clostridia	Clostridiales	Ruminococcaceae	[Eubacterium]_coprostanoligenes_group			Otu0207	Firmicutes	Clostridia	Clostridiales	Ruminococcaceae	Ruminiclostridium_5
Otu0206	Firmicutes	Clostridia	Clostridiales	Ruminococcaceae	Ruminococcaceae_NK4A214_group			Otu0208	Firmicutes	Clostridia	Clostridiales	Ruminococcaceae	Ruminococcaceae_UCG-014
Otu0207	Firmicutes	Clostridia	Clostridiales	Ruminococcaceae	Ruminiclostridium_5			Otu0209	Firmicutes	Clostridia	Clostridiales	Ruminococcaceae	Ruminococcaceae_UCG-014
Otu0208	Firmicutes	Clostridia	Clostridiales	Ruminococcaceae	Ruminococcaceae_UCG-014			Otu0210	Firmicutes	Clostridia	Clostridiales	Lachnospiraceae	NA
Otu0209	Firmicutes	Clostridia	Clostridiales	Ruminococcaceae	Ruminococcaceae_UCG-014			Otu0211	Firmicutes	Clostridia	Clostridiales	Lachnospiraceae	Tyzzerella_3
Otu0210	Firmicutes	Clostridia	Clostridiales	Lachnospiraceae	NA			Otu0212	Tenericutes	Mollicutes	Mollicutes_RF9	Mollicutes_RF9_unclassified	NA
Otu0211	Firmicutes	Clostridia	Clostridiales	Lachnospiraceae	Tyzzerella_3			Otu0213	Firmicutes	Clostridia	Clostridiales	Ruminococcaceae	Ruminococcaceae_UCG-014
Otu0212	Tenericutes	Mollicutes	Mollicutes_RF9	Mollicutes_RF9_unclassified	NA			Otu0214	Firmicutes	Clostridia	Clostridiales	Christensenellaceae	Christensenellaceae_R-7_group
Otu0213	Firmicutes	Clostridia	Clostridiales	Ruminococcaceae	Ruminococcaceae_UCG-014			Otu0215	Firmicutes	Clostridia	Clostridiales	Eubacteriaceae	Anaerofustis
Otu0214	Firmicutes	Clostridia	Clostridiales	Christensenellaceae	Christensenellaceae_R-7_group			Otu0216	Firmicutes	Clostridia	Clostridiales	Clostridiales_unclassified	NA
Otu0215	Firmicutes	Clostridia	Clostridiales	Eubacteriaceae	Anaerofustis			Otu0217	Firmicutes	Clostridia	Clostridiales	Ruminococcaceae	Ruminococcaceae_NK4A214_group
Otu0216	Firmicutes	Clostridia	Clostridiales	Clostridiales_unclassified	NA			Otu0218	Tenericutes	Mollicutes	Mollicutes_RF9	Mollicutes_RF9_unclassified	NA
Otu0217	Firmicutes	Clostridia	Clostridiales	Ruminococcaceae	Ruminococcaceae_NK4A214_group			Otu0219	Firmicutes	Clostridia	Clostridiales	Ruminococcaceae	NA
Otu0218	Tenericutes	Mollicutes	Mollicutes_RF9	Mollicutes_RF9_unclassified	NA			Otu0220	Firmicutes	Clostridia	Clostridiales	Ruminococcaceae	NA
Otu0219	Firmicutes	Clostridia	Clostridiales	Ruminococcaceae	NA			Otu0222	Firmicutes	Clostridia	Clostridiales	Ruminococcaceae	Ruminococcaceae_UCG-014
Otu0220	Firmicutes	Clostridia	Clostridiales	Ruminococcaceae	NA			Otu0223	Firmicutes	Clostridia	Clostridiales	Ruminococcaceae	Ruminiclostridium_5
Otu0222	Firmicutes	Clostridia	Clostridiales	Ruminococcaceae	Ruminococcaceae_UCG-014			Otu0224	Firmicutes	Erysipelotrichia	Erysipelotrichales	Erysipelotrichaceae	Turicibacter
Otu0223	Firmicutes	Clostridia	Clostridiales	Ruminococcaceae	Ruminiclostridium_5			Otu0225	Firmicutes	Clostridia	Clostridiales	Ruminococcaceae	NA
Otu0224	Firmicutes	Erysipelotrichia	Erysipelotrichales	Erysipelotrichaceae	Turicibacter			Otu0226	Tenericutes	Mollicutes	Mollicutes_RF9	Mollicutes_RF9_unclassified	NA
Otu0225	Firmicutes	Clostridia	Clostridiales	Ruminococcaceae	NA			Otu0227	Firmicutes	Clostridia	Clostridiales	Ruminococcaceae	NA
Otu0226	Tenericutes	Mollicutes	Mollicutes_RF9	Mollicutes_RF9_unclassified	NA			Otu0228	Firmicutes	Clostridia	Clostridiales	Ruminococcaceae	Ruminococcaceae_UCG-014
Otu0227	Firmicutes	Clostridia	Clostridiales	Ruminococcaceae	NA			Otu0229	Bacteria_unclassified	Bacteria_unclassified	Bacteria_unclassified	Bacteria_unclassified	NA
Otu0228	Firmicutes	Clostridia	Clostridiales	Ruminococcaceae	Ruminococcaceae_UCG-014			Otu0230	Firmicutes	Clostridia	Clostridiales	Ruminococcaceae	NA
Otu0229	Bacteria_unclassified	Bacteria_unclassified	Bacteria_unclassified	Bacteria_unclassified	NA			Otu0231	Firmicutes	Clostridia	Clostridiales	Ruminococcaceae	NA
Otu0230	Firmicutes	Clostridia	Clostridiales	Ruminococcaceae	NA			Otu0232	Firmicutes	Clostridia	Clostridiales	Ruminococcaceae	Ruminiclostridium_5
Otu0231	Firmicutes	Clostridia	Clostridiales	Ruminococcaceae	NA			Otu0233	Firmicutes	Clostridia	Clostridiales	Ruminococcaceae	Ruminiclostridium_5
Otu0232	Firmicutes	Clostridia	Clostridiales	Ruminococcaceae	Ruminiclostridium_5			Otu0234	Firmicutes	Clostridia	Clostridiales	Ruminococcaceae	Ruminiclostridium_5
Otu0233	Firmicutes	Clostridia	Clostridiales	Ruminococcaceae	Ruminiclostridium_5			Otu0235	Firmicutes	Clostridia	Clostridiales	Ruminococcaceae	NA
Otu0234	Firmicutes	Clostridia	Clostridiales	Ruminococcaceae	Ruminiclostridium_5			Otu0236	Firmicutes	Clostridia	Clostridiales	Ruminococcaceae	Ruminococcaceae_UCG-013
Otu0235	Firmicutes	Clostridia	Clostridiales	Ruminococcaceae	NA			Otu0237	Firmicutes	Clostridia	Clostridiales	Ruminococcaceae	NA
Otu0236	Firmicutes	Clostridia	Clostridiales	Ruminococcaceae	Ruminococcaceae_UCG-013			Otu0238	Firmicutes	Clostridia	Clostridiales	Lachnospiraceae	NA
Otu0238	Firmicutes	Clostridia	Clostridiales	Lachnospiraceae	NA			Otu0239	Firmicutes	Clostridia	Clostridiales	Lachnospiraceae	NA
Otu0239	Firmicutes	Clostridia	Clostridiales	Lachnospiraceae	NA			Otu0240	Firmicutes	Firmicutes_unclassified	Firmicutes_unclassified	Firmicutes_unclassified	NA
Otu0240	Firmicutes	Firmicutes_unclassified	Firmicutes_unclassified	Firmicutes_unclassified	NA			Otu0241	Bacteria_unclassified	Bacteria_unclassified	Bacteria_unclassified	Bacteria_unclassified	NA
Otu0241	Bacteria_unclassified	Bacteria_unclassified	Bacteria_unclassified	Bacteria_unclassified	NA			Otu0242	Firmicutes	Clostridia	Clostridiales	Lachnospiraceae	Tyzzerella_3
Otu0242	Firmicutes	Clostridia	Clostridiales	Lachnospiraceae	Tyzzerella_3			Otu0243	Firmicutes	Clostridia	Clostridiales	Ruminococcaceae	Ruminococcaceae_UCG-014
Otu0243	Firmicutes	Clostridia	Clostridiales	Ruminococcaceae	Ruminococcaceae_UCG-014			Otu0244	Proteobacteria	Gammaproteobacteria	Enterobacteriales	Enterobacteriaceae	NA
Otu0244	Proteobacteria	Gammaproteobacteria	Enterobacteriales	Enterobacteriaceae	NA			Otu0245	Bacteria_unclassified	Bacteria_unclassified	Bacteria_unclassified	Bacteria_unclassified	NA
Otu0245	Bacteria_unclassified	Bacteria_unclassified	Bacteria_unclassified	Bacteria_unclassified	NA			Otu0246	Tenericutes	Mollicutes	Mollicutes_RF9	Mollicutes_RF9_unclassified	NA
Otu0247	Firmicutes	Clostridia	Clostridiales	Ruminococcaceae	Ruminiclostridium_5			Otu0247	Firmicutes	Clostridia	Clostridiales	Ruminococcaceae	Ruminiclostridium_5
Otu0248	Firmicutes	Firmicutes_unclassified	Firmicutes_unclassified	Firmicutes_unclassified	NA			Otu0248	Firmicutes	Firmicutes_unclassified	Firmicutes_unclassified	Firmicutes_unclassified	NA
Otu0249	Firmicutes	Clostridia	Clostridiales	Family_XIII	Family_XIII_UCG-001			Otu0249	Firmicutes	Clostridia	Clostridiales	Family_XIII	Family_XIII_UCG-001
Otu0250	Firmicutes	Clostridia	Clostridiales	Clostridiales_unclassified	NA			Otu0250	Firmicutes	Clostridia	Clostridiales	Clostridiales_unclassified	NA
Otu0251	Firmicutes	Clostridia	Clostridiales	Ruminococcaceae	NA			Otu0251	Firmicutes	Clostridia	Clostridiales	Ruminococcaceae	NA
Otu0252	Firmicutes	Clostridia	Clostridiales	Ruminococcaceae	Anaerotruncus			Otu0252	Firmicutes	Clostridia	Clostridiales	Ruminococcaceae	Anaerotruncus
Otu0253	Firmicutes	Clostridia	Clostridiales	Clostridiaceae_1	Clostridium_sensu_stricto_1			Otu0253	Firmicutes	Clostridia	Clostridiales	Clostridiaceae_1	Clostridium_sensu_stricto_1
Otu0254	Firmicutes	Clostridia	Clostridiales	Ruminococcaceae	Ruminococcaceae_UCG-005			Otu0254	Firmicutes	Clostridia	Clostridiales	Ruminococcaceae	Ruminococcaceae_UCG-005
Otu0255	Firmicutes	Clostridia	Clostridiales	Defluviitaleaceae	Defluviitaleaceae_UCG-011			Otu0255	Firmicutes	Clostridia	Clostridiales	Defluviitaleaceae	Defluviitaleaceae_UCG-011
Otu0256	Tenericutes	Mollicutes	Mollicutes_RF9	Mollicutes_RF9_unclassified	NA			Otu0256	Tenericutes	Mollicutes	Mollicutes_RF9	Mollicutes_RF9_unclassified	NA
Otu0257	Firmicutes	Clostridia	Clostridiales	Clostridiales_vadinBB60_group	NA			Otu0257	Firmicutes	Clostridia	Clostridiales	Clostridiales_vadinBB60_group	NA
Otu0258	Tenericutes	Mollicutes	Mollicutes_RF9	Mollicutes_RF9_unclassified	NA			Otu0258	Tenericutes	Mollicutes	Mollicutes_RF9	Mollicutes_RF9_unclassified	NA
Otu0259	Firmicutes	Clostridia	Clostridiales	Lachnospiraceae	Lachnospiraceae_NK4A136_group			Otu0259	Firmicutes	Clostridia	Clostridiales	Lachnospiraceae	Lachnospiraceae_NK4A136_group
Otu0260	Firmicutes	Clostridia	Clostridiales	Ruminococcaceae	NA			Otu0260	Firmicutes	Clostridia	Clostridiales	Ruminococcaceae	NA
Otu0261	Firmicutes	Clostridia	Clostridiales	Lachnospiraceae	NA			Otu0261	Firmicutes	Clostridia	Clostridiales	Lachnospiraceae	NA
Otu0262	Firmicutes	Clostridia	Clostridiales	Ruminococcaceae	Anaerotruncus			Otu0262	Firmicutes	Clostridia	Clostridiales	Ruminococcaceae	Anaerotruncus
Otu0263	Actinobacteria	Coriobacteriia	Coriobacteriales	Coriobacteriaceae	Gordonibacter			Otu0263	Actinobacteria	Coriobacteriia	Coriobacteriales	Coriobacteriaceae	Gordonibacter
Otu0264	Firmicutes	Clostridia	Clostridiales	Ruminococcaceae	Ruminiclostridium_5			Otu0264	Firmicutes	Clostridia	Clostridiales	Ruminococcaceae	Ruminiclostridium_5
Otu0265	Bacteroidetes	Bacteroidia	Bacteroidales	Bacteroidaceae	Bacteroides			Otu0265	Bacteroidetes	Bacteroidia	Bacteroidales	Bacteroidaceae	Bacteroides
Otu0266	Tenericutes	Mollicutes	Mollicutes_RF9	Mollicutes_RF9_unclassified	NA			Otu0266	Tenericutes	Mollicutes	Mollicutes_RF9	Mollicutes_RF9_unclassified	NA
Otu0267	Bacteria_unclassified	Bacteria_unclassified	Bacteria_unclassified	Bacteria_unclassified	NA			Otu0268	Firmicutes	Clostridia	Clostridiales	Lachnospiraceae	Lachnoclostridium
Otu0268	Firmicutes	Clostridia	Clostridiales	Lachnospiraceae	Lachnoclostridium			Otu0269	Bacteria_unclassified	Bacteria_unclassified	Bacteria_unclassified	Bacteria_unclassified	NA
Otu0270	Lentisphaerae	Lentisphaerae_RFP12_gut_group	Lentisphaerae_RFP12_gut_group_unclassified	Lentisphaerae_RFP12_gut_group_unclassified	NA			Otu0270	Lentisphaerae	Lentisphaerae_RFP12_gut_group	Lentisphaerae_RFP12_gut_group_unclassified	Lentisphaerae_RFP12_gut_group_unclassified	NA
Otu0272	Firmicutes	Clostridia	Clostridiales	Ruminococcaceae	Ruminococcus_1			Otu0271	Firmicutes	Clostridia	Clostridiales	Lachnospiraceae	Lachnospiraceae_NC2004_group
Otu0273	Firmicutes	Clostridia	Clostridiales	Lachnospiraceae	NA			Otu0272	Firmicutes	Clostridia	Clostridiales	Ruminococcaceae	Ruminococcus_1
Otu0274	Firmicutes	Clostridia	Clostridiales	Lachnospiraceae	NA			Otu0273	Firmicutes	Clostridia	Clostridiales	Lachnospiraceae	NA
Otu0275	Firmicutes	Clostridia	Clostridiales	Lachnospiraceae	NA			Otu0274	Firmicutes	Clostridia	Clostridiales	Lachnospiraceae	NA
Otu0276	Firmicutes	Clostridia	Clostridiales	Ruminococcaceae	Candidatus_Soleaferrea			Otu0275	Firmicutes	Clostridia	Clostridiales	Lachnospiraceae	NA
Otu0277	Firmicutes	Clostridia	Clostridiales	Ruminococcaceae	Anaerotruncus			Otu0276	Firmicutes	Clostridia	Clostridiales	Ruminococcaceae	Candidatus_Soleaferrea
Otu0278	Bacteria_unclassified	Bacteria_unclassified	Bacteria_unclassified	Bacteria_unclassified	NA			Otu0277	Firmicutes	Clostridia	Clostridiales	Ruminococcaceae	Anaerotruncus
Otu0279	Firmicutes	Clostridia	Clostridiales	Lachnospiraceae	NA			Otu0278	Bacteria_unclassified	Bacteria_unclassified	Bacteria_unclassified	Bacteria_unclassified	NA
Otu0281	Firmicutes	Clostridia	Clostridiales	Lachnospiraceae	Lachnoclostridium			Otu0279	Firmicutes	Clostridia	Clostridiales	Lachnospiraceae	NA
Otu0282	Tenericutes	Mollicutes	Mollicutes_RF9	Mollicutes_RF9_unclassified	NA			Otu0281	Firmicutes	Clostridia	Clostridiales	Lachnospiraceae	Lachnoclostridium
Otu0283	Firmicutes	Clostridia	Clostridiales	Family_XIII	[Eubacterium]_brachy_group			Otu0282	Tenericutes	Mollicutes	Mollicutes_RF9	Mollicutes_RF9_unclassified	NA
Otu0284	Firmicutes	Clostridia	Clostridiales	Ruminococcaceae	NA			Otu0283	Firmicutes	Clostridia	Clostridiales	Family_XIII	[Eubacterium]_brachy_group
Otu0285	Firmicutes	Clostridia	Clostridiales	Clostridiales_unclassified	NA			Otu0284	Firmicutes	Clostridia	Clostridiales	Ruminococcaceae	NA
Otu0286	Firmicutes	Clostridia	Clostridiales	Clostridiales_vadinBB60_group	NA			Otu0285	Firmicutes	Clostridia	Clostridiales	Clostridiales_unclassified	NA
Otu0287	Firmicutes	Clostridia	Clostridiales	Ruminococcaceae	Anaerotruncus			Otu0286	Firmicutes	Clostridia	Clostridiales	Clostridiales_vadinBB60_group	NA
Otu0288	Firmicutes	Clostridia	Clostridiales	Ruminococcaceae	NA			Otu0287	Firmicutes	Clostridia	Clostridiales	Ruminococcaceae	Anaerotruncus
Otu0289	Proteobacteria	Epsilonproteobacteria	Campylobacterales	Helicobacteraceae	Helicobacter			Otu0288	Firmicutes	Clostridia	Clostridiales	Ruminococcaceae	NA
Otu0290	Firmicutes	Clostridia	Clostridiales	Ruminococcaceae	Ruminiclostridium_5			Otu0289	Proteobacteria	Epsilonproteobacteria	Campylobacterales	Helicobacteraceae	Helicobacter
Otu0291	Firmicutes	Clostridia	Clostridiales	Lachnospiraceae	Lachnospiraceae_NK4A136_group			Otu0290	Firmicutes	Clostridia	Clostridiales	Ruminococcaceae	Ruminiclostridium_5
Otu0292	Firmicutes	Clostridia	Clostridiales	Clostridiales_vadinBB60_group	NA			Otu0291	Firmicutes	Clostridia	Clostridiales	Lachnospiraceae	Lachnospiraceae_NK4A136_group
Otu0293	Bacteroidetes	Bacteroidia	Bacteroidales	Bacteroidaceae	Bacteroides			Otu0292	Firmicutes	Clostridia	Clostridiales	Clostridiales_vadinBB60_group	NA
Otu0296	Firmicutes	Bacilli	Lactobacillales	Enterococcaceae	Catellicoccus			Otu0293	Bacteroidetes	Bacteroidia	Bacteroidales	Bacteroidaceae	Bacteroides
Otu0297	Firmicutes	Clostridia	Clostridiales	Ruminococcaceae	NA			Otu0295	Tenericutes	Mollicutes	Mollicutes_RF9	Mollicutes_RF9_unclassified	NA
Otu0298	Firmicutes	Clostridia	Clostridiales	Ruminococcaceae	NA			Otu0296	Firmicutes	Bacilli	Lactobacillales	Enterococcaceae	Catellicoccus
Otu0299	Firmicutes	Clostridia	Clostridiales	Family_XIII	Family_XIII_AD3011_group			Otu0297	Firmicutes	Clostridia	Clostridiales	Ruminococcaceae	NA
Otu0300	Firmicutes	Clostridia	Clostridiales	Ruminococcaceae	Ruminiclostridium_5			Otu0298	Firmicutes	Clostridia	Clostridiales	Ruminococcaceae	NA
Otu0301	Firmicutes	Clostridia	Clostridiales	Ruminococcaceae	NA			Otu0299	Firmicutes	Clostridia	Clostridiales	Family_XIII	Family_XIII_AD3011_group
Otu0302	Firmicutes	Clostridia	Clostridiales	Lachnospiraceae	NA			Otu0300	Firmicutes	Clostridia	Clostridiales	Ruminococcaceae	Ruminiclostridium_5
Otu0303	Firmicutes	Clostridia	Clostridiales	Ruminococcaceae	Ruminiclostridium_5			Otu0301	Firmicutes	Clostridia	Clostridiales	Ruminococcaceae	NA
Otu0304	Firmicutes	Erysipelotrichia	Erysipelotrichales	Erysipelotrichaceae	NA			Otu0302	Firmicutes	Clostridia	Clostridiales	Lachnospiraceae	NA
Otu0306	Firmicutes	Clostridia	Clostridiales	Lachnospiraceae	NA			Otu0303	Firmicutes	Clostridia	Clostridiales	Ruminococcaceae	Ruminiclostridium_5
Otu0307	Firmicutes	Clostridia	Clostridiales	Family_XIII	NA			Otu0304	Firmicutes	Erysipelotrichia	Erysipelotrichales	Erysipelotrichaceae	NA
Otu0309	Bacteroidetes	Bacteroidia	Bacteroidales	Bacteroidaceae	Bacteroides			Otu0306	Firmicutes	Clostridia	Clostridiales	Lachnospiraceae	NA
Otu0310	Firmicutes	Clostridia	Clostridiales	Ruminococcaceae	Anaerotruncus			Otu0307	Firmicutes	Clostridia	Clostridiales	Family_XIII	NA
Otu0311	Firmicutes	Clostridia	Clostridiales	Lachnospiraceae	Lachnoclostridium			Otu0309	Bacteroidetes	Bacteroidia	Bacteroidales	Bacteroidaceae	Bacteroides
Otu0312	Tenericutes	Mollicutes	Anaeroplasmatales	Anaeroplasmataceae	Anaeroplasma			Otu0310	Firmicutes	Clostridia	Clostridiales	Ruminococcaceae	Anaerotruncus
Otu0313	Firmicutes	Clostridia	Clostridiales	Clostridiales_vadinBB60_group	NA			Otu0311	Firmicutes	Clostridia	Clostridiales	Lachnospiraceae	Lachnoclostridium
Otu0314	Firmicutes	Negativicutes	Selenomonadales	Acidaminococcaceae	Phascolarctobacterium			Otu0313	Firmicutes	Clostridia	Clostridiales	Clostridiales_vadinBB60_group	NA
Otu0315	Firmicutes	Clostridia	Clostridiales	Lachnospiraceae	Tyzzerella			Otu0314	Firmicutes	Negativicutes	Selenomonadales	Acidaminococcaceae	Phascolarctobacterium
Otu0316	Firmicutes	Clostridia	Clostridiales	Ruminococcaceae	Intestinimonas			Otu0315	Firmicutes	Clostridia	Clostridiales	Lachnospiraceae	Tyzzerella
Otu0317	Firmicutes	Clostridia	Clostridiales	Ruminococcaceae	[Eubacterium]_coprostanoligenes_group			Otu0316	Firmicutes	Clostridia	Clostridiales	Ruminococcaceae	Intestinimonas
Otu0318	Firmicutes	Clostridia	Clostridiales	Ruminococcaceae	Ruminococcaceae_UCG-010			Otu0317	Firmicutes	Clostridia	Clostridiales	Ruminococcaceae	[Eubacterium]_coprostanoligenes_group
Otu0319	Firmicutes	Clostridia	Clostridiales	Lachnospiraceae	NA			Otu0318	Firmicutes	Clostridia	Clostridiales	Ruminococcaceae	Ruminococcaceae_UCG-010
Otu0320	Bacteroidetes	Bacteroidia	Bacteroidales	Bacteroidaceae	Bacteroides			Otu0319	Firmicutes	Clostridia	Clostridiales	Lachnospiraceae	NA
Otu0321	Firmicutes	Clostridia	Clostridiales	Ruminococcaceae	Anaerotruncus			Otu0320	Bacteroidetes	Bacteroidia	Bacteroidales	Bacteroidaceae	Bacteroides
Otu0322	Firmicutes	Clostridia	Clostridiales	Ruminococcaceae	Ruminiclostridium_5			Otu0321	Firmicutes	Clostridia	Clostridiales	Ruminococcaceae	Anaerotruncus
Otu0324	Tenericutes	Mollicutes	Mollicutes_RF9	Mollicutes_RF9_unclassified	NA			Otu0322	Firmicutes	Clostridia	Clostridiales	Ruminococcaceae	Ruminiclostridium_5
Otu0325	Firmicutes	Clostridia	Clostridiales	Ruminococcaceae	Ruminiclostridium_5			Otu0324	Tenericutes	Mollicutes	Mollicutes_RF9	Mollicutes_RF9_unclassified	NA
Otu0326	Firmicutes	Bacilli	Lactobacillales	Streptococcaceae	Streptococcus			Otu0325	Firmicutes	Clostridia	Clostridiales	Ruminococcaceae	Ruminiclostridium_5
Otu0328	Firmicutes	Clostridia	Clostridiales	Lachnospiraceae	NA			Otu0326	Firmicutes	Bacilli	Lactobacillales	Streptococcaceae	Streptococcus
Otu0329	Bacteroidetes	Bacteroidia	Bacteroidales	Bacteroidaceae	Bacteroides			Otu0328	Firmicutes	Clostridia	Clostridiales	Lachnospiraceae	NA
Otu0330	Firmicutes	Clostridia	Clostridiales	Ruminococcaceae	Anaerotruncus			Otu0329	Bacteroidetes	Bacteroidia	Bacteroidales	Bacteroidaceae	Bacteroides
Otu0331	Bacteroidetes	Bacteroidia	Bacteroidales	Bacteroidales_unclassified	NA			Otu0332	Firmicutes	Clostridia	Clostridiales	Clostridiales_vadinBB60_group	NA
Otu0332	Firmicutes	Clostridia	Clostridiales	Clostridiales_vadinBB60_group	NA			Otu0333	Firmicutes	Clostridia	Clostridiales	Ruminococcaceae	NA
Otu0333	Firmicutes	Clostridia	Clostridiales	Ruminococcaceae	NA			Otu0335	Firmicutes	Clostridia	Clostridiales	Ruminococcaceae	Ruminiclostridium_5
Otu0335	Firmicutes	Clostridia	Clostridiales	Ruminococcaceae	Ruminiclostridium_5			Otu0337	Firmicutes	Clostridia	Clostridiales	Ruminococcaceae	Candidatus_Soleaferrea
Otu0337	Firmicutes	Clostridia	Clostridiales	Ruminococcaceae	Candidatus_Soleaferrea			Otu0338	Firmicutes	Clostridia	Clostridiales	Ruminococcaceae	NA
Otu0338	Firmicutes	Clostridia	Clostridiales	Ruminococcaceae	NA			Otu0339	Firmicutes	Clostridia	Clostridiales	Ruminococcaceae	Ruminiclostridium_5
Otu0339	Firmicutes	Clostridia	Clostridiales	Ruminococcaceae	Ruminiclostridium_5			Otu0340	Firmicutes	Clostridia	Clostridiales	Lachnospiraceae	NA
Otu0340	Firmicutes	Clostridia	Clostridiales	Lachnospiraceae	NA			Otu0341	Firmicutes	Clostridia	Clostridiales	Ruminococcaceae	Anaerotruncus
Otu0341	Firmicutes	Clostridia	Clostridiales	Ruminococcaceae	Anaerotruncus			Otu0342	Firmicutes	Clostridia	Clostridiales	Christensenellaceae	Christensenellaceae_R-7_group
Otu0342	Firmicutes	Clostridia	Clostridiales	Christensenellaceae	Christensenellaceae_R-7_group			Otu0343	Bacteroidetes	Bacteroidia	Bacteroidales	Prevotellaceae	Prevotellaceae_Ga6A1_group
Otu0343	Bacteroidetes	Bacteroidia	Bacteroidales	Prevotellaceae	Prevotellaceae_Ga6A1_group			Otu0344	Proteobacteria	Deltaproteobacteria	Desulfovibrionales	Desulfovibrionaceae	Desulfovibrio
Otu0344	Proteobacteria	Deltaproteobacteria	Desulfovibrionales	Desulfovibrionaceae	Desulfovibrio			Otu0345	Bacteria_unclassified	Bacteria_unclassified	Bacteria_unclassified	Bacteria_unclassified	NA
Otu0345	Bacteria_unclassified	Bacteria_unclassified	Bacteria_unclassified	Bacteria_unclassified	NA			Otu0346	Firmicutes	Clostridia	Clostridiales	Ruminococcaceae	NA
Otu0346	Firmicutes	Clostridia	Clostridiales	Ruminococcaceae	NA			Otu0348	Bacteroidetes	Bacteroidia	Bacteroidales	Prevotellaceae	Prevotellaceae_Ga6A1_group
Otu0348	Bacteroidetes	Bacteroidia	Bacteroidales	Prevotellaceae	Prevotellaceae_Ga6A1_group			Otu0349	Firmicutes	Clostridia	Clostridiales	Ruminococcaceae	Anaerotruncus
Otu0349	Firmicutes	Clostridia	Clostridiales	Ruminococcaceae	Anaerotruncus			Otu0350	Firmicutes	Clostridia	Clostridiales	Lachnospiraceae	NA
Otu0350	Firmicutes	Clostridia	Clostridiales	Lachnospiraceae	NA			Otu0351	Bacteroidetes	Bacteroidia	Bacteroidales	Bacteroidaceae	Bacteroides
Otu0351	Bacteroidetes	Bacteroidia	Bacteroidales	Bacteroidaceae	Bacteroides			Otu0352	Firmicutes	Clostridia	Clostridiales	Ruminococcaceae	NA
Otu0353	Elusimicrobia	Elusimicrobia	Elusimicrobiales	Elusimicrobiaceae	Elusimicrobium			Otu0353	Elusimicrobia	Elusimicrobia	Elusimicrobiales	Elusimicrobiaceae	Elusimicrobium
Otu0355	Firmicutes	Clostridia	Clostridiales	Clostridiales_unclassified	NA			Otu0356	Firmicutes	Clostridia	Clostridiales	Lachnospiraceae	NA
Otu0356	Firmicutes	Clostridia	Clostridiales	Lachnospiraceae	NA			Otu0358	Bacteroidetes	Bacteroidia	Bacteroidales	Porphyromonadaceae	Parabacteroides
Otu0358	Bacteroidetes	Bacteroidia	Bacteroidales	Porphyromonadaceae	Parabacteroides			Otu0359	Firmicutes	Clostridia	Clostridiales	Clostridiales_unclassified	NA
Otu0359	Firmicutes	Clostridia	Clostridiales	Clostridiales_unclassified	NA			Otu0362	Firmicutes	Clostridia	Clostridiales	Ruminococcaceae	Anaerofilum
Otu0362	Firmicutes	Clostridia	Clostridiales	Ruminococcaceae	Anaerofilum			Otu0363	Firmicutes	Clostridia	Clostridiales	Lachnospiraceae	NA
Otu0363	Firmicutes	Clostridia	Clostridiales	Lachnospiraceae	NA			Otu0365	Firmicutes	Clostridia	Clostridiales	Ruminococcaceae	NA
Otu0365	Firmicutes	Clostridia	Clostridiales	Ruminococcaceae	NA			Otu0367	Firmicutes	Clostridia	Clostridiales	Clostridiales_unclassified	NA
Otu0366	Firmicutes	Clostridia	Clostridiales	Lachnospiraceae	Coprococcus_1			Otu0368	Firmicutes	Clostridia	Clostridiales	Ruminococcaceae	NA
Otu0367	Firmicutes	Clostridia	Clostridiales	Clostridiales_unclassified	NA			Otu0369	Firmicutes	Clostridia	Clostridiales	Lachnospiraceae	NA
Otu0369	Firmicutes	Clostridia	Clostridiales	Lachnospiraceae	NA			Otu0372	Firmicutes	Clostridia	Clostridiales	Lachnospiraceae	NA
Otu0372	Firmicutes	Clostridia	Clostridiales	Lachnospiraceae	NA			Otu0373	Firmicutes	Clostridia	Clostridiales	Clostridiales_unclassified	NA
Otu0373	Firmicutes	Clostridia	Clostridiales	Clostridiales_unclassified	NA			Otu0375	Tenericutes	Mollicutes	Mollicutes_RF9	Mollicutes_RF9_unclassified	NA
Otu0375	Tenericutes	Mollicutes	Mollicutes_RF9	Mollicutes_RF9_unclassified	NA			Otu0377	Firmicutes	Negativicutes	Selenomonadales	Veillonellaceae	Megamonas
Otu0377	Firmicutes	Negativicutes	Selenomonadales	Veillonellaceae	Megamonas			Otu0378	Firmicutes	Clostridia	Clostridiales	Clostridiales_unclassified	NA
Otu0378	Firmicutes	Clostridia	Clostridiales	Clostridiales_unclassified	NA			Otu0380	Firmicutes	Clostridia	Clostridiales	Ruminococcaceae	NA
Otu0379	Tenericutes	Mollicutes	Mollicutes_RF9	Mollicutes_RF9_unclassified	NA			Otu0381	Firmicutes	Clostridia	Clostridiales	Lachnospiraceae	NA
Otu0381	Firmicutes	Clostridia	Clostridiales	Lachnospiraceae	NA			Otu0382	Synergistetes	Synergistia	Synergistales	Synergistaceae	Synergistes
Otu0382	Synergistetes	Synergistia	Synergistales	Synergistaceae	Synergistes			Otu0383	Firmicutes	Clostridia	Clostridiales	Ruminococcaceae	Ruminococcaceae_UCG-014
Otu0386	Firmicutes	Clostridia	Clostridiales	Clostridiales_unclassified	NA			Otu0386	Firmicutes	Clostridia	Clostridiales	Clostridiales_unclassified	NA
Otu0387	Firmicutes	Clostridia	Clostridiales	Ruminococcaceae	Ruminiclostridium_5			Otu0387	Firmicutes	Clostridia	Clostridiales	Ruminococcaceae	Ruminiclostridium_5
Otu0388	Bacteria_unclassified	Bacteria_unclassified	Bacteria_unclassified	Bacteria_unclassified	NA			Otu0388	Bacteria_unclassified	Bacteria_unclassified	Bacteria_unclassified	Bacteria_unclassified	NA
Otu0389	Bacteroidetes	Bacteroidetes_unclassified	Bacteroidetes_unclassified	Bacteroidetes_unclassified	NA			Otu0389	Bacteroidetes	Bacteroidetes_unclassified	Bacteroidetes_unclassified	Bacteroidetes_unclassified	NA
Otu0392	Firmicutes	Clostridia	Thermoanaerobacterales	Thermoanaerobacteraceae	Gelria			Otu0392	Firmicutes	Clostridia	Thermoanaerobacterales	Thermoanaerobacteraceae	Gelria
Otu0398	Firmicutes	Clostridia	Clostridiales	Ruminococcaceae	Ruminiclostridium_5			Otu0396	Firmicutes	Clostridia	Clostridiales	Ruminococcaceae	NA
Otu0407	Firmicutes	Clostridia	Clostridiales	Ruminococcaceae	Ruminococcaceae_UCG-014			Otu0398	Firmicutes	Clostridia	Clostridiales	Ruminococcaceae	Ruminiclostridium_5
Otu0410	Cyanobacteria	Melainabacteria	Gastranaerophilales	Gastranaerophilales_unclassified	NA			Otu0399	Firmicutes	Clostridia	Clostridiales	Ruminococcaceae	NA
Otu0412	Bacteroidetes	Bacteroidia	Bacteroidales	Rikenellaceae	Rikenellaceae_RC9_gut_group			Otu0402	Firmicutes	Clostridia	Clostridiales	Ruminococcaceae	NA
Otu0413	Firmicutes	Clostridia	Clostridiales	Ruminococcaceae	Ruminococcaceae_UCG-010			Otu0407	Firmicutes	Clostridia	Clostridiales	Ruminococcaceae	Ruminococcaceae_UCG-014
Otu0425	Firmicutes	Clostridia	Clostridiales	Ruminococcaceae	Ruminococcaceae_UCG-013			Otu0412	Bacteroidetes	Bacteroidia	Bacteroidales	Rikenellaceae	Rikenellaceae_RC9_gut_group
Otu0427	Firmicutes	Clostridia	Clostridiales	Ruminococcaceae	NA			Otu0413	Firmicutes	Clostridia	Clostridiales	Ruminococcaceae	Ruminococcaceae_UCG-010
Otu0434	Firmicutes	Clostridia	Clostridiales	Lachnospiraceae	NA			Otu0421	Firmicutes	Clostridia	Clostridiales	Ruminococcaceae	Ruminococcaceae_UCG-014
Otu0438	Bacteroidetes	Bacteroidia	Bacteroidales	Rikenellaceae	Rikenellaceae_RC9_gut_group			Otu0425	Firmicutes	Clostridia	Clostridiales	Ruminococcaceae	Ruminococcaceae_UCG-013
Otu0444	Firmicutes	Clostridia	Clostridiales	Ruminococcaceae	Anaerotruncus			Otu0427	Firmicutes	Clostridia	Clostridiales	Ruminococcaceae	NA
								Otu0434	Firmicutes	Clostridia	Clostridiales	Lachnospiraceae	NA
								Otu0444	Firmicutes	Clostridia	Clostridiales	Ruminococcaceae	Anaerotruncus
								Otu0451	Firmicutes	Clostridia	Clostridiales	Ruminococcaceae	Anaerofilum
