# Supplementary material for: Circadian disruption and divergent microbiota acquisition under extended photoperiod regimens in chicken
Source: PeerJ. 2019 Mar 14;7:e6592. doi: 10.7717/peerj.6592 (PMC6421066; doi:10.7717/peerj.6592)
Supplement: Supplemental Information 6 — Table summarizing the information on qPCR Primers used in our study, including primer sequences, source, and additional details. [file peerj-07-6592-s006.xlsx]

## Sheet: Sheet1
Gene Symbol	Full Name	Location	Exon Count	NCBI Reference Sequence (RefSeq)	Forward Primer Sequence (5'-3') on Plus Strand	Reverse Primer Sequence (5'-3') on Minus Strand	Melting Temp (∘C)	Product Length
Clock	clock circadian regulator	chromosome 4	27	NM_204174.3	GCTGTCTTCTGGACCTTGTGT	TTTGCTGATTATGCTGTGATGCAG	60.20-60.44	278
Bmal1/ARNTL	clock gene / aryl hydrocarbon receptor nuclear translocator-like	chromosome 5	21	AF193070.1 & AF205219.1 / NM_001001463.2	ACTTGATGGCTTTCCTTTTGAGG	TGGGTTTGTAGCACCACGTA	59.24-59.42	274
Per2	clock gene	chromosome 9	30	NM_204262.1	CGAGGTCAGGGGGTTCTACT	CTTCGGGAGAGTGTTCAGGT	59.03-60.32	197
